# Supplementary material for: Organometallic Ru, Os, Rh and Ir half-sandwich conjugates of ispinesib – impact of the organometallic group on the antimitotic activity
Source: Royal Society of Chemistry journal article supplement (doi:10.1039/d3dt01217d), 2023-01-01
Supplement: d3dt01217d1.pdf [file d3dt01217d1.pdf]

## **Organometallic Ru, Os, Rh and Ir Half-Sandwich Conjugates of Ispinesib - Impact of the Organometallic Group on the Antimitotic Activity**

Michał Łomzik<sup>a</sup>, Andrzej Błauż<sup>b</sup>, Marta Głodek<sup>a</sup>, Anna Makal<sup>c</sup>, Daniel Tchoń<sup>c,f</sup>, Daniel Moscoh Ayine-Tora<sup>d</sup>, Christian Hartinger<sup>e</sup>, Błażej Rychlik<sup>b</sup>, Damian Plażuk<sup>a\*</sup>

<sup>a</sup> *Department of Organic Chemistry, Faculty of Chemistry, University of Lodz, ul. Tamka 12, 91-403 Łódź, Poland*

<sup>b</sup> *Cytometry Lab, Department of Oncobiology and Epigenetics, Faculty of Biology and Environmental Protection, University of Lodz, University of Lodz, ul. Pomorska 141/143, W24, 90-236 Łódź, Poland*

<sup>c</sup> *Laboratory for Structural and Biochemical Research (LBSBio), Biological and Chemical Research Centre, Department of Chemistry, University of Warsaw, ul. Zwirki i Wigury 101, 02-089 Warszawa, Poland*

<sup>d</sup> *Department of Chemistry, University of Ghana, LG 56, Legon-Accra, Ghana*

<sup>e</sup> *School of Chemical Sciences, The University of Auckland, Private Bag 92019, Auckland 1142, New Zealand*

<sup>f</sup> *Molecular Biophysics and Integrated Bioimaging Division, Lawrence Berkeley National Laboratory, Berkeley, CA 94720, USA*

## Table of Contents

|                                                                                                     |    |
|-----------------------------------------------------------------------------------------------------|----|
| COPIES OF DOSY SPECTRA.....                                                                         | 3  |
| LC-MS ANALYSIS.....                                                                                 | 6  |
| TABLE S1. SUMMARY OF THE MOST IMPORTANT DATA AND STRUCTURE FOR<br>$3E^{S,R/R} \cdot CH_2CL_2$ ..... | 16 |
| ESI-MS ANALYSIS OF THE COMPLEXES IN DMSO SOLUTION .....                                             | 20 |
| STABILITY IN DMEM – UV-VIS ANALYSIS .....                                                           | 23 |
| MOLECULAR MODELLING .....                                                                           | 28 |
| COPIES OF NMR SPECTRA .....                                                                         | 30 |

## Copies of DOSY spectra

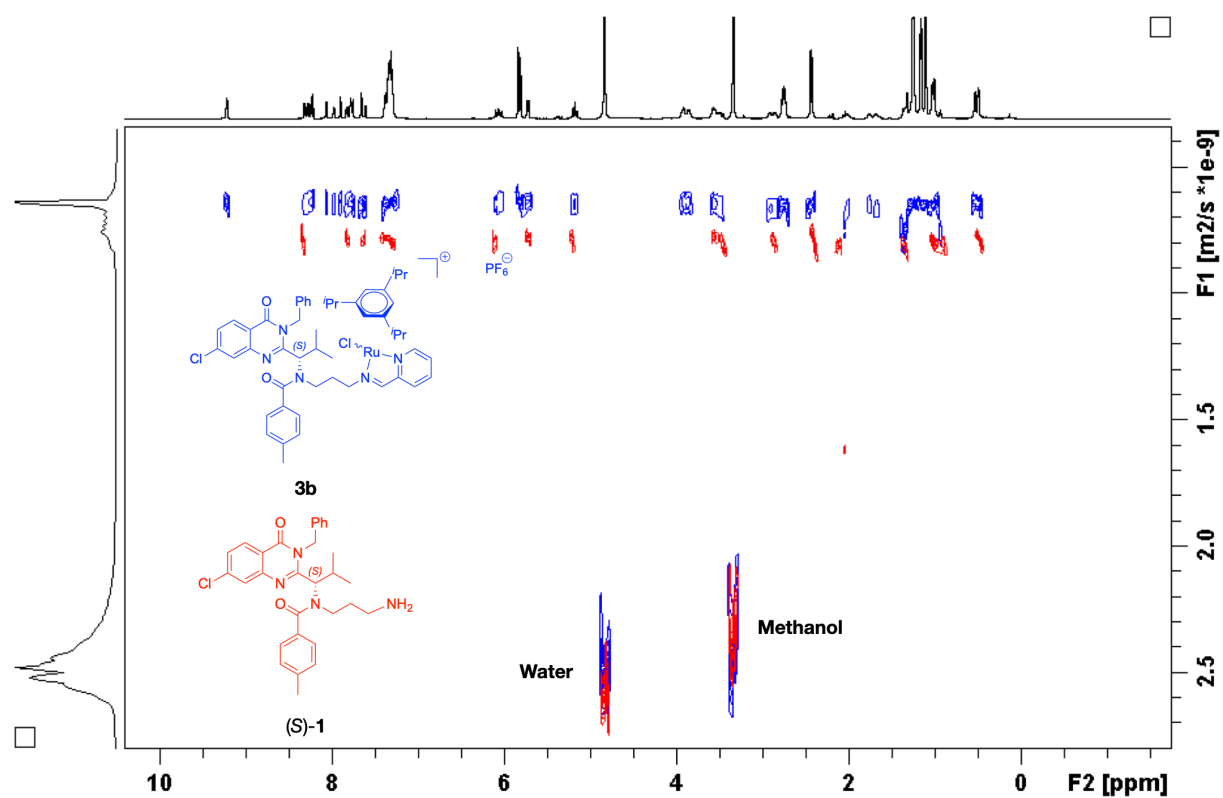

Supporting Figure S1. Overlaid <sup>1</sup>H DOSY spectra of **3b** and **(S)-1** in methanol-d<sub>4</sub>

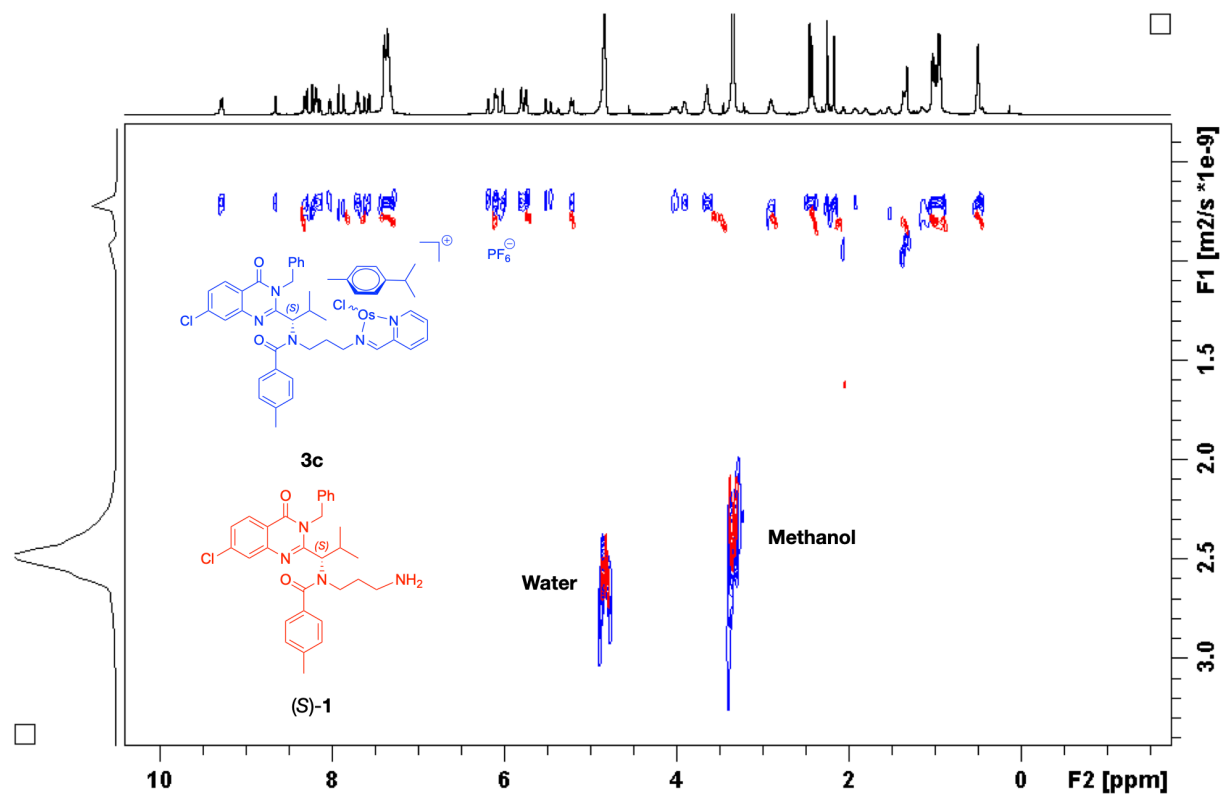

Supporting Figure S2. Overlaid <sup>1</sup>H DOSY spectra of **3c** and **(S)-1** in methanol-d<sub>4</sub>

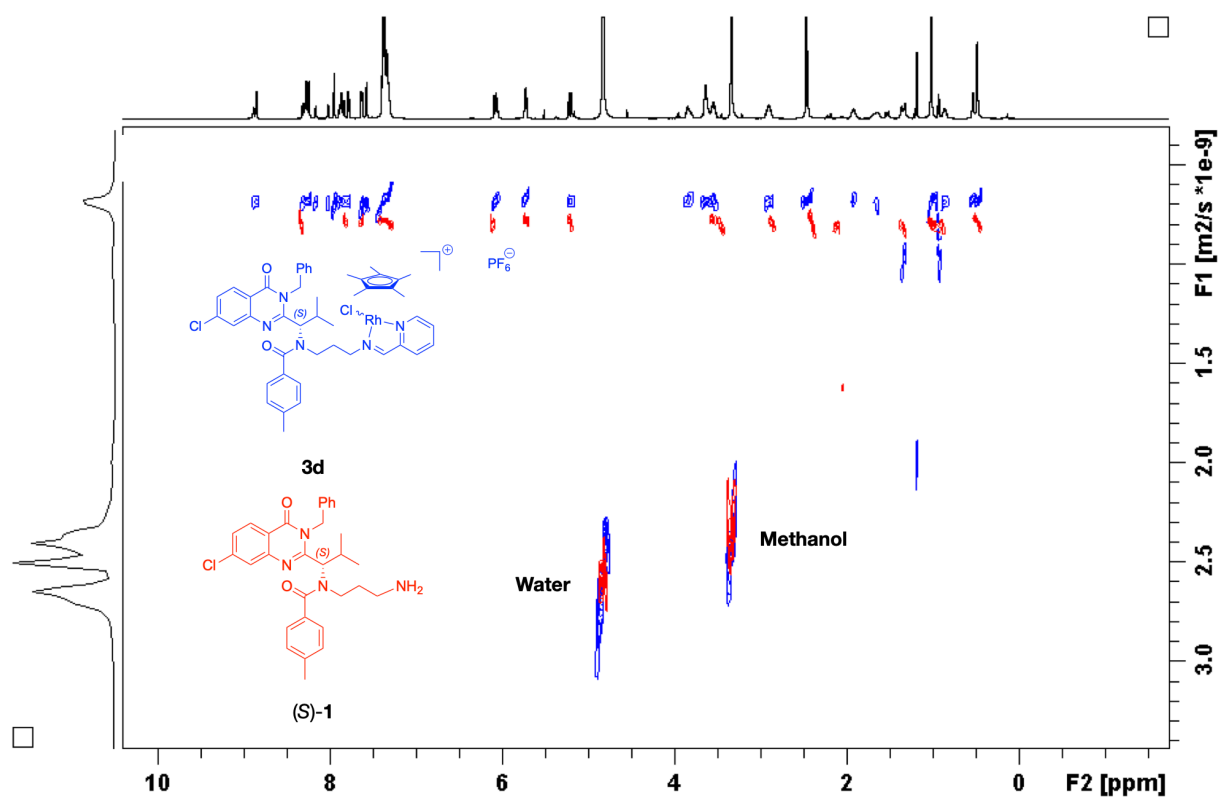

Supporting Figure S3. Overlaid  $^1\text{H}$  DOSY spectra of **3d** and **(S)-1** in methanol- $\text{d}_4$

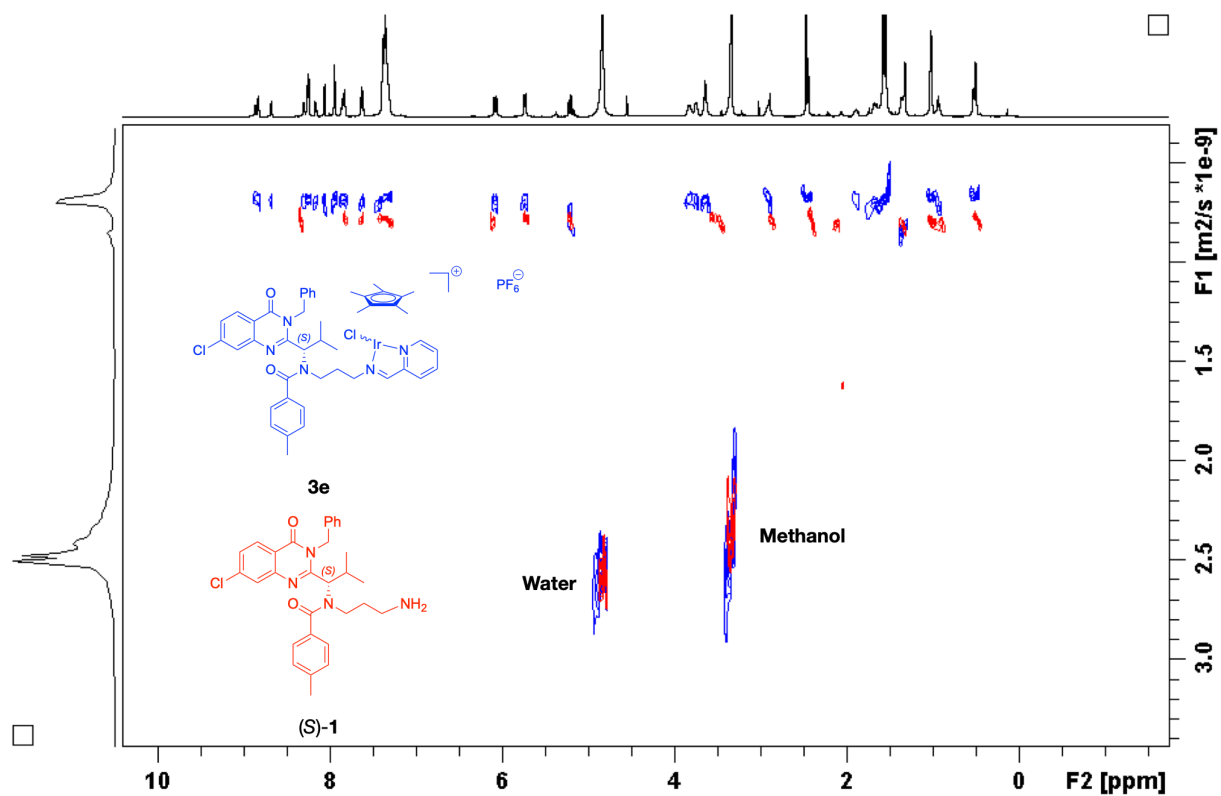

Supporting Figure S4. Overlaid  $^1\text{H}$  DOSY spectra of **3e** and **(S)-1** in methanol- $\text{d}_4$

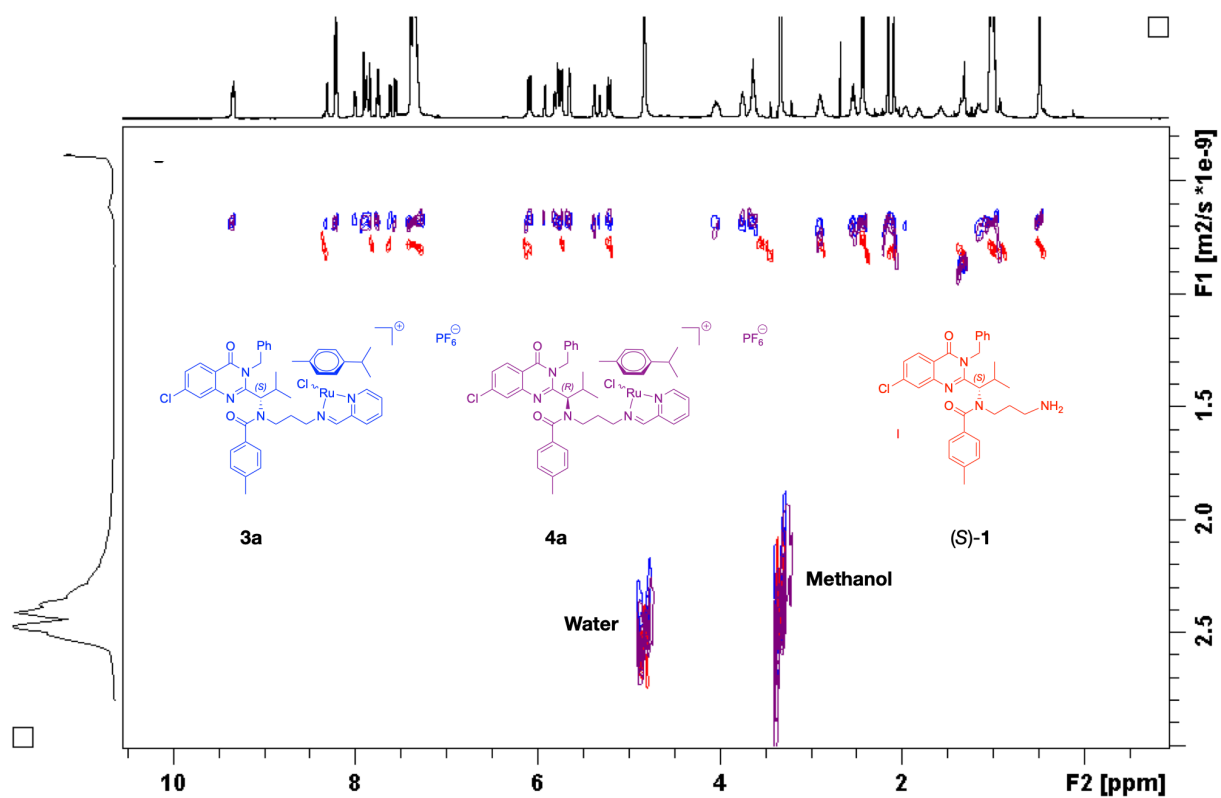

**Supporting Figure S5.** Overlaid  $^1\text{H}$  DOSY spectra of **3a**, **4a** and **(S)-1** in methanol- $\text{d}_4$

## LC-MS Analysis

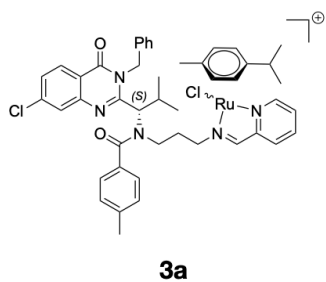

$m/z$   $[3a - PF_6^-]^+$

Chemical Formula:  $C_{46}H_{50}Cl_2N_5O_2Ru^+$   
Exact Mass: 876.2

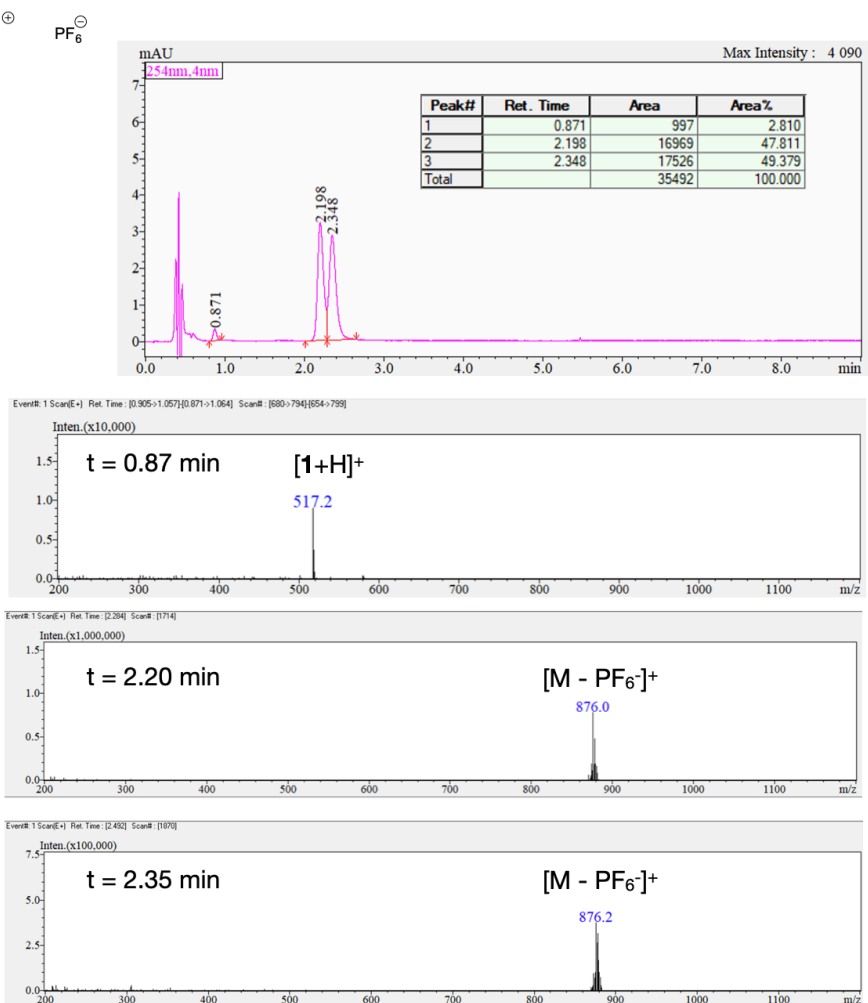

Supporting Figure S6. HPLC-MS analysis of **3a**

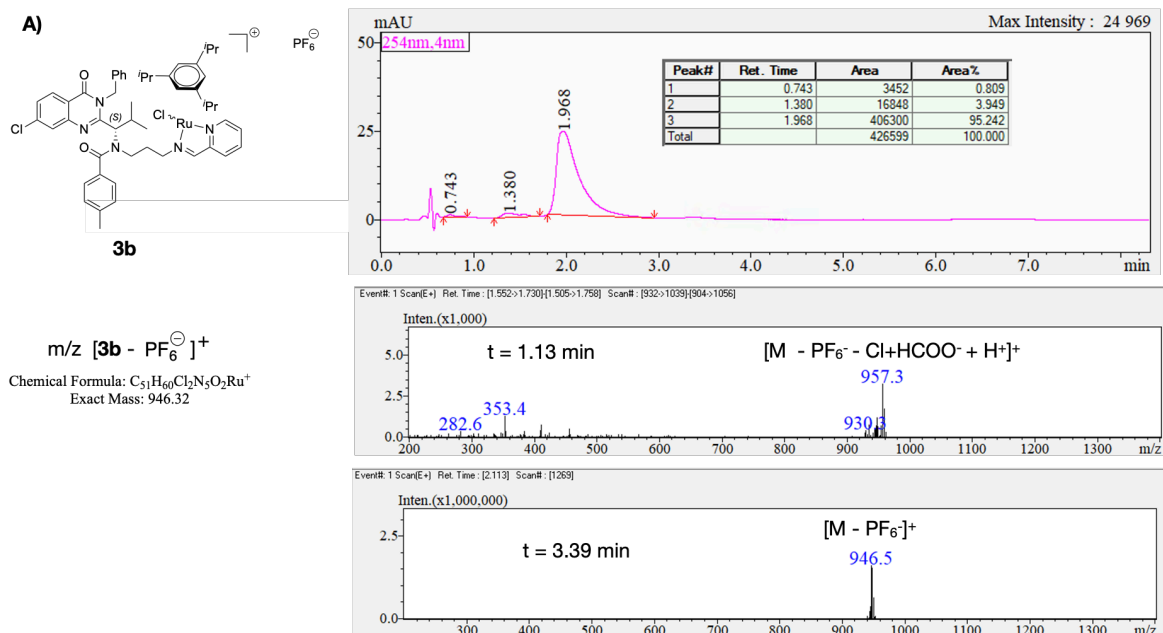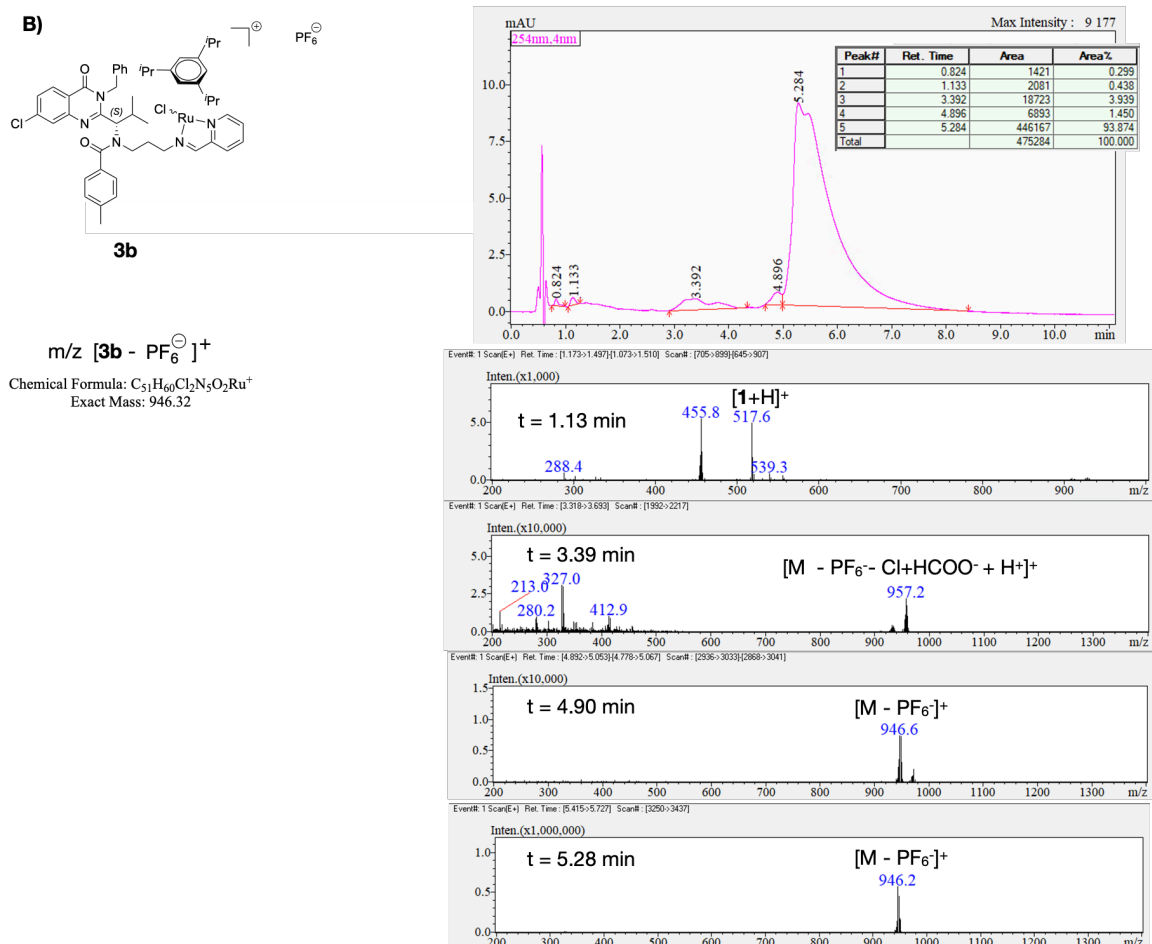

**Supporting Figure S7.** HPLC-MS analysis of **3b**. A) mobile phase 27.5% of MeOH and 27.5% MeCN in water + 0.01% of HCOOH as eluent with flow rate of 0.3 mL·min<sup>-1</sup>; B) mobile phase 65% of MeOH in water + 0.01% of HCOOH as eluent with flow rate of 0.4 mL·min<sup>-1</sup>;

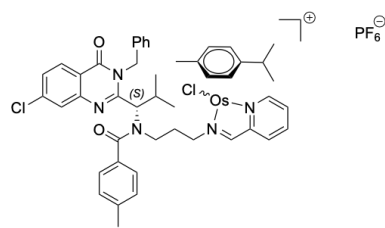

$m/z$   $[3c - PF_6^-]^+$

Chemical Formula:  $C_{46}H_{50}Cl_2N_5O_2Os^+$   
Exact Mass: 966.3

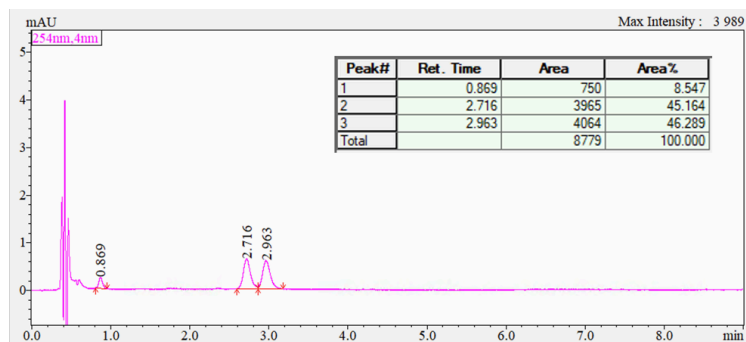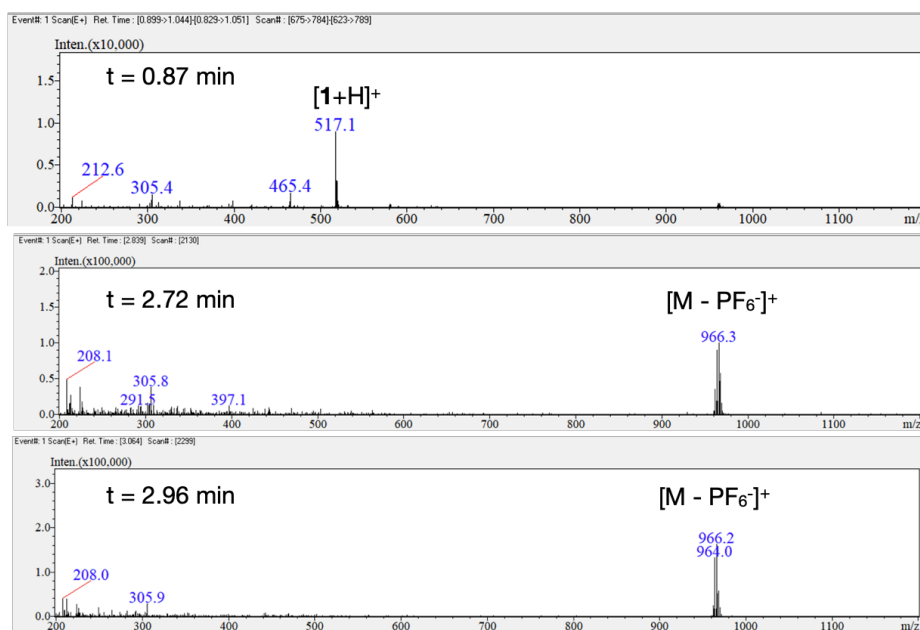

**Supporting Figure S8. HPLC-MS analysis of 3c**



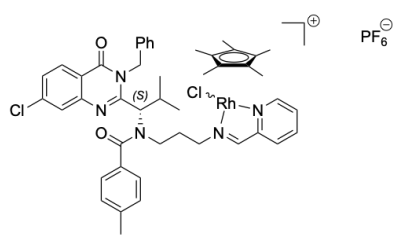

**3d**

$m/z$  [**3d** - PF<sub>6</sub><sup>-</sup>]<sup>+</sup>

Chemical Formula: C<sub>46</sub>H<sub>51</sub>Cl<sub>2</sub>N<sub>5</sub>O<sub>2</sub>Rh<sup>+</sup>  
Exact Mass: 878.2

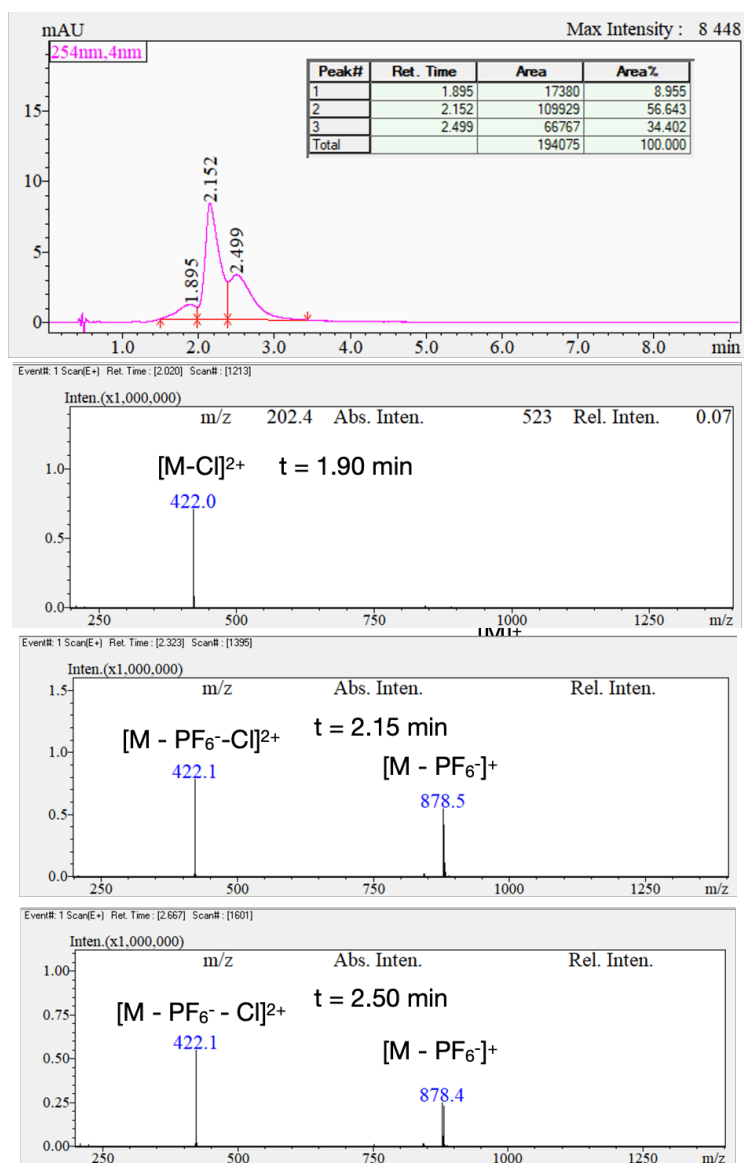

**Supporting Figure S9.** HPLC-MS analysis of **3d**

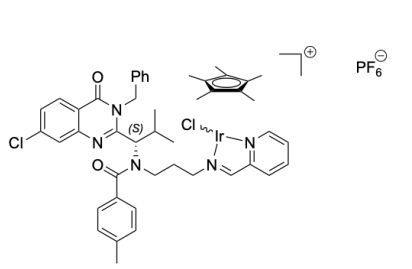

**3e**

$m/z$   $[3e - PF_6^-]^+$   
 Chemical Formula:  $C_{46}H_{51}Cl_2IrN_5O_2^+$   
 Exact Mass: 968.30

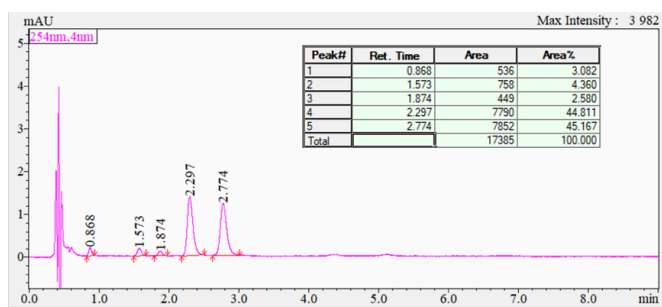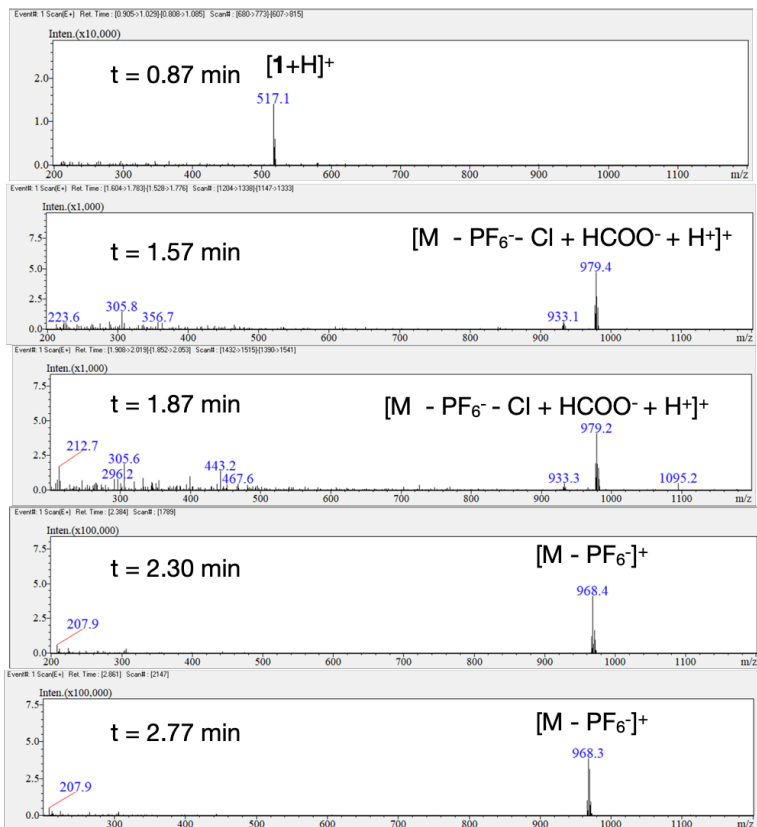

Supporting Figure S10. HPLC-MS analysis of **3e**

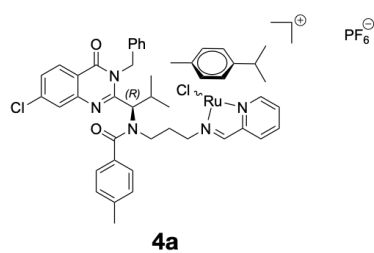

$m/z$   $[4a - PF_6^-]^+$   
 Chemical Formula:  $C_{46}H_{50}Cl_2N_5O_2Ru^+$   
 Exact Mass: 876.2

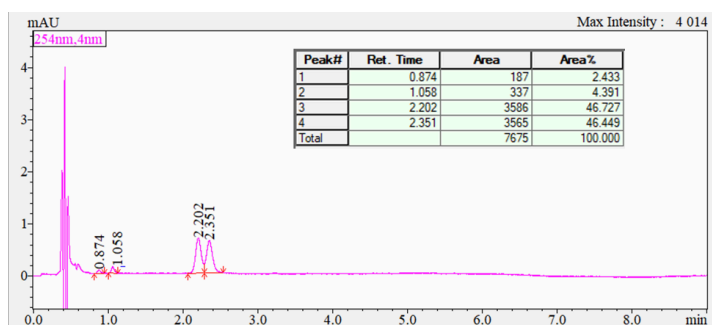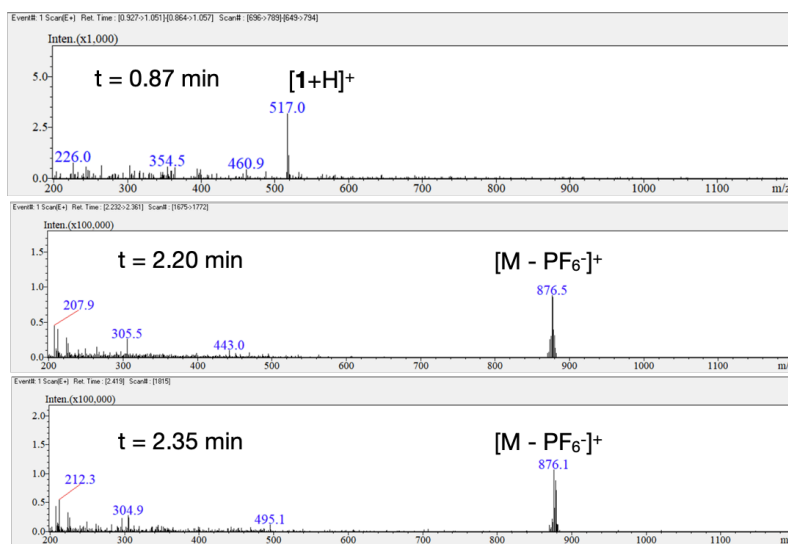

**Supporting Figure S11. HPLC-MS analysis of 4a**

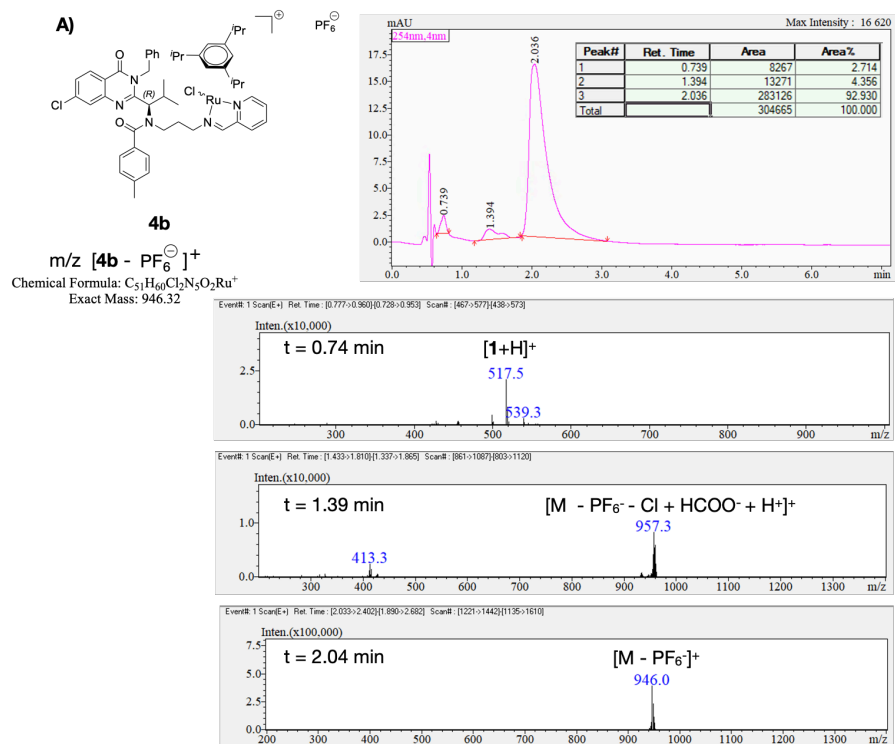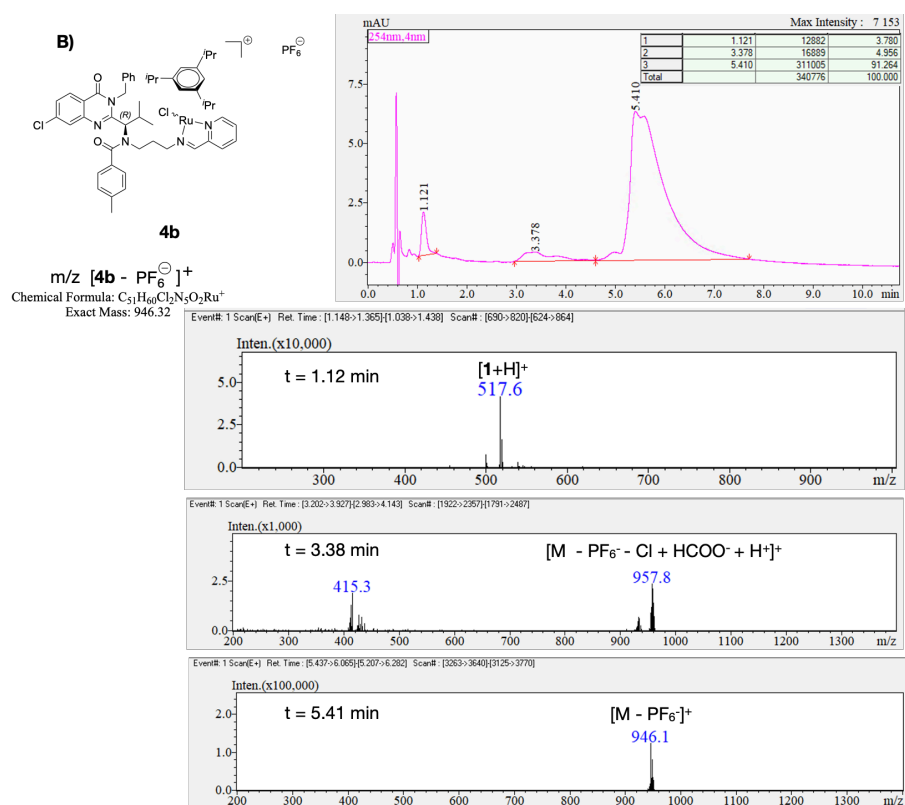

65% MeOH in Water

**Supporting Figure S12** HPLC-MS analysis of **4b** A) mobile phase 27.5% of MeOH and 27.5% MeCN in water + 0.01% of HCOOH as eluent with flow rate of 0.3 mL·min<sup>-1</sup>; B) mobile phase 65% of MeOH in water + 0.01% of HCOOH as eluent with flow rate of 0.4 mL·min<sup>-1</sup>;

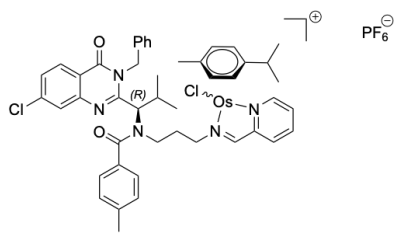

**4c**

$m/z$   $[4c - PF_6^-]^+$

Chemical Formula:  $C_{46}H_{50}Cl_2N_5O_2Os^+$   
Exact Mass: 966.3

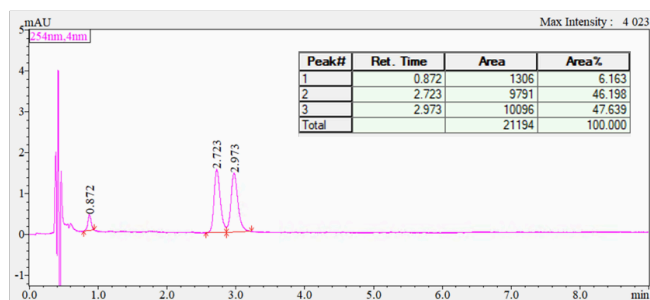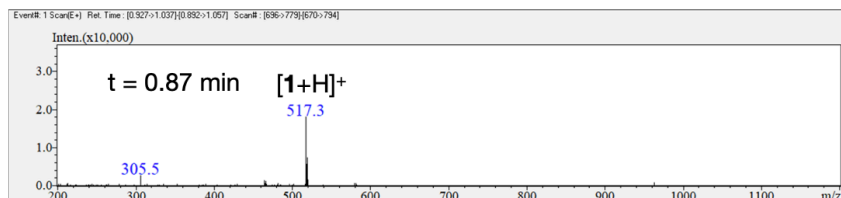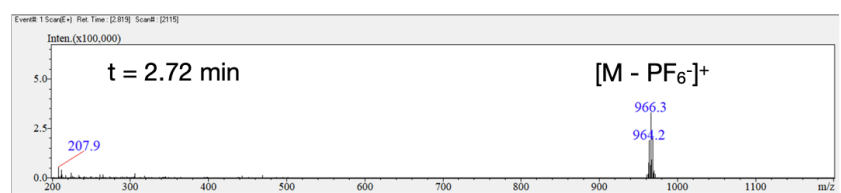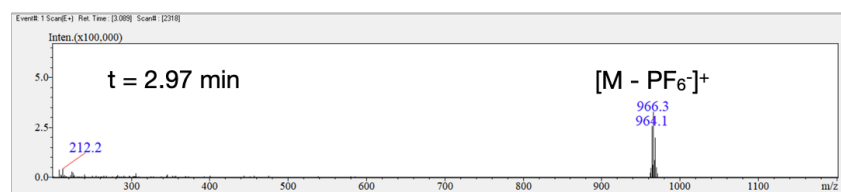

**Supporting Figure S13. HPLC-MS analysis of 4c**

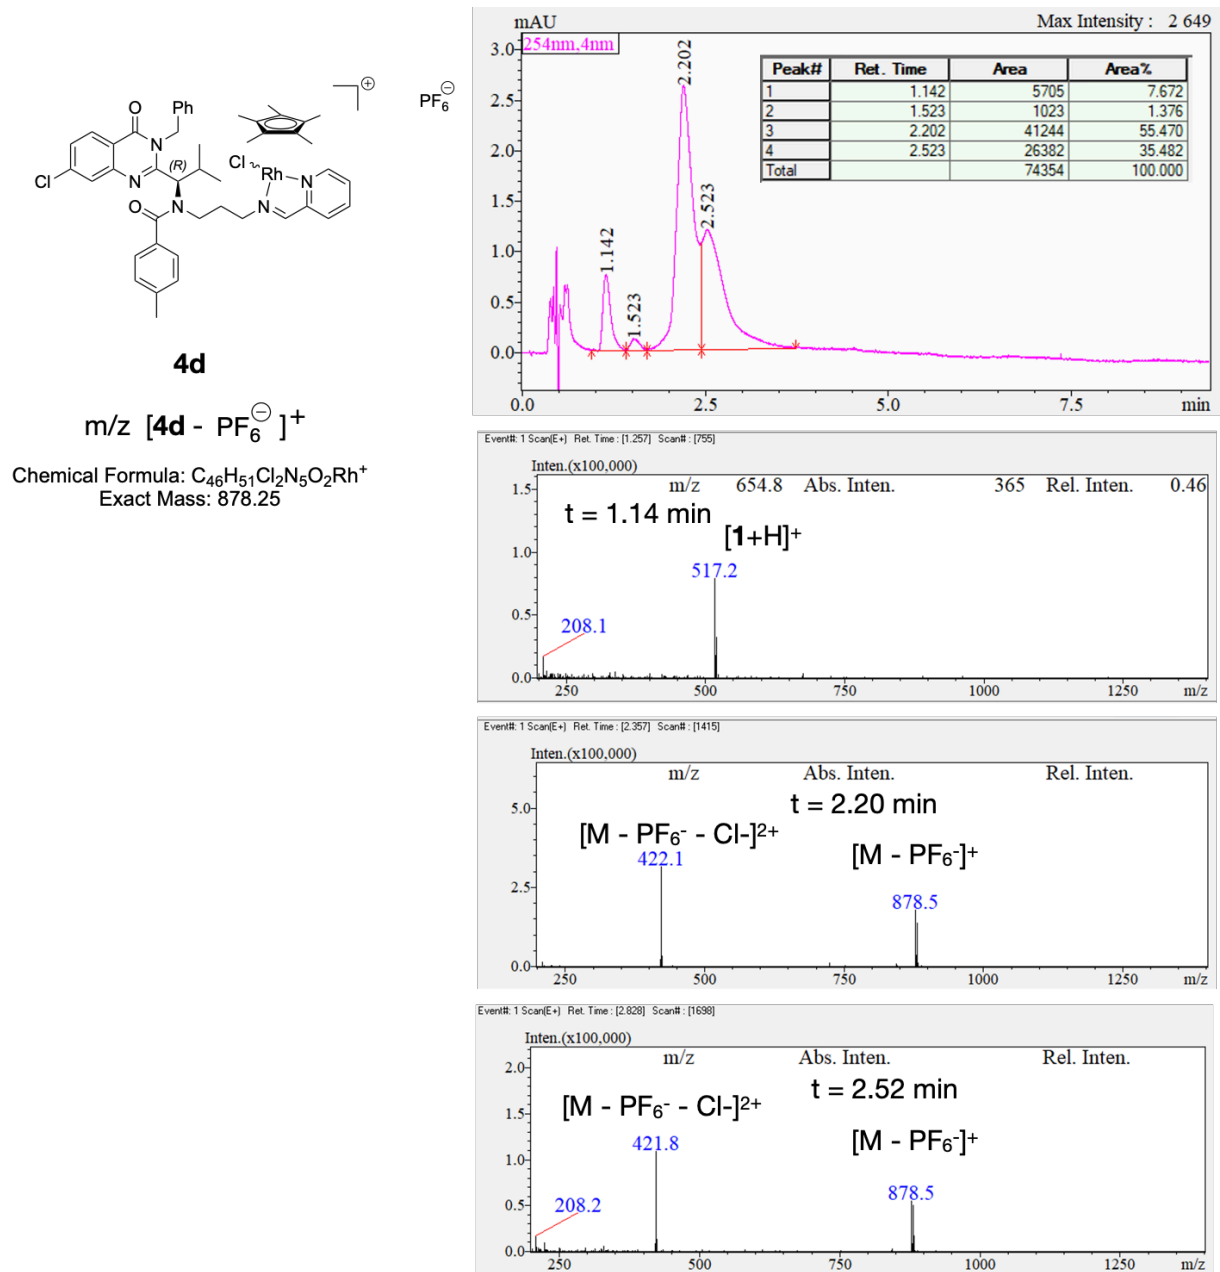

Supporting Figure S14. HPLC-MS analysis of **4d**

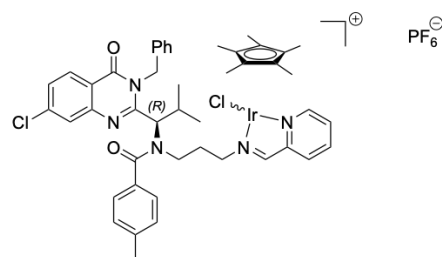

**4e**

$m/z$  [4e - PF<sub>6</sub><sup>-</sup>]<sup>+</sup>

Chemical Formula: C<sub>46</sub>H<sub>51</sub>Cl<sub>2</sub>IrN<sub>5</sub>O<sub>2</sub><sup>+</sup>  
Exact Mass: 968.30

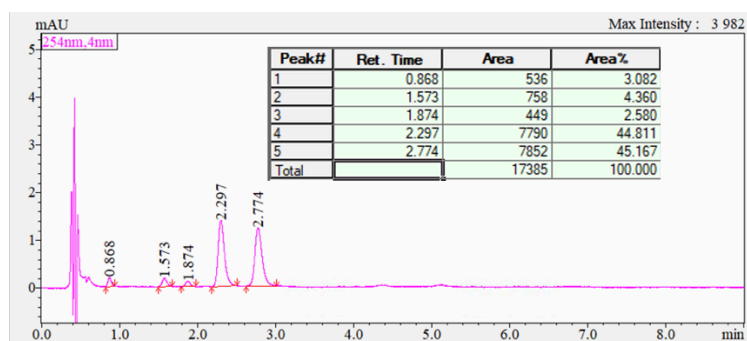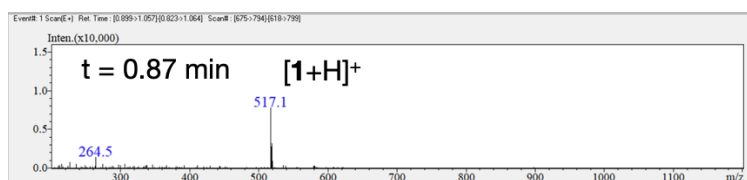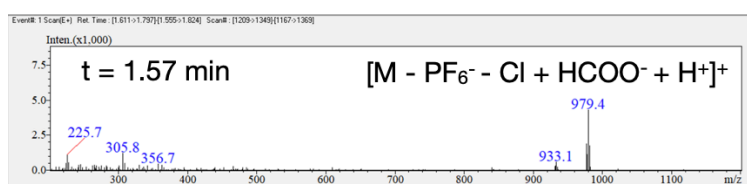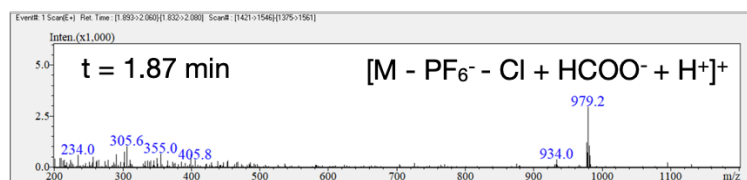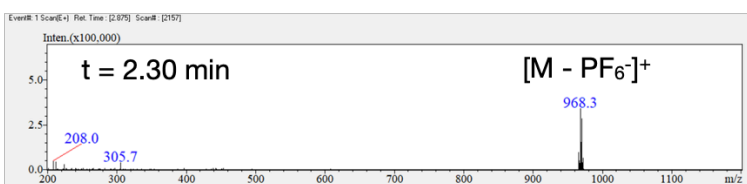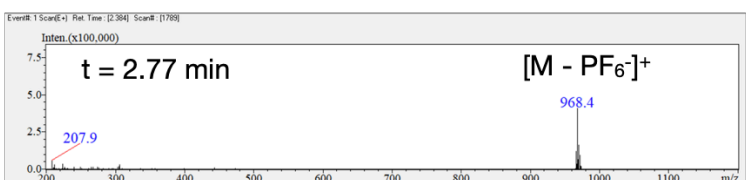

Supporting Figure S15. HPLC-MS analysis of **4e**

**Table S1.** Summary of the most important data and structure for **3e<sup>S,R/r</sup>·CH<sub>2</sub>Cl<sub>2</sub>**.

| <b>Compound</b>                      | <b>3e<sup>S,R/r</sup></b>                                                                                                        |
|--------------------------------------|----------------------------------------------------------------------------------------------------------------------------------|
| Empirical formula                    | C <sub>46</sub> H <sub>51</sub> Cl <sub>2</sub> IrN <sub>5</sub> O <sub>2</sub> F <sub>6</sub> P·CH <sub>2</sub> Cl <sub>2</sub> |
| CCDC number                          | 2207901                                                                                                                          |
| Formula weight                       | 1198.91                                                                                                                          |
| Crystal system                       | monoclinic                                                                                                                       |
| Space group                          | P2 <sub>1</sub>                                                                                                                  |
| a/Å                                  | 8.6827(2)                                                                                                                        |
| b/Å                                  | 11.6490(3)                                                                                                                       |
| c/Å                                  | 25.0534(7)                                                                                                                       |
| α/°                                  | 90                                                                                                                               |
| β/°                                  | 89.971(2)                                                                                                                        |
| γ/°                                  | 90                                                                                                                               |
| Volume/Å <sup>3</sup>                | 2534.02(11)                                                                                                                      |
| Z                                    | 2                                                                                                                                |
| ρ <sub>calc</sub> mg/mm <sup>3</sup> | 1.571                                                                                                                            |
| F(000)                               | 1200                                                                                                                             |
| μ/mm <sup>-1</sup>                   | 7.890                                                                                                                            |
| Max. transmission                    | 0.901                                                                                                                            |
| Min. transmission                    | 0.420                                                                                                                            |
| Absorption corr.                     | Gaussian                                                                                                                         |
| Crystal color                        | clear light yellow                                                                                                               |
| Crystal habit                        | plate                                                                                                                            |



|                                      |                       |
|--------------------------------------|-----------------------|
| Crystal size/mm                      | 0.157 × 0.121 × 0.015 |
| R <sub>int</sub>                     | 0.0432                |
| R <sub>sigma</sub>                   | 0.0384                |
| Index ranges: h                      | 10 -10                |
| k                                    | 14 -14                |
| l                                    | 31 -31                |
| Reflections collected                | 37198                 |
| 2 $\Theta$ range : max               | 77.034                |
| min                                  | 1.763                 |
| Temperature/K                        | 100.0(1)              |
| X-ray wavelength/Å                   | 1.54184               |
| Independent refl. I > 2 $\sigma$ (I) | 10259                 |
| Independent refl.                    | 10400                 |
| Largest diff.:                       |                       |
| peak /e Å <sup>-3</sup>              | 5.482                 |
| hole /e Å <sup>-3</sup>              | -2.099                |
| Goodness-of-fit on F <sup>2</sup>    | 1.061                 |
| Parameters                           | 604                   |
| Data                                 | 15726                 |
| Restraints                           | 130                   |
| R1 all data                          | 0.0489                |
| R1 [I ≥ 2 $\sigma$ (I)]              | 0.0481                |
| wR2 all data                         | 0.1125                |

|                               |           |
|-------------------------------|-----------|
| wR2 [I $\geq$ 2 $\sigma$ (I)] | 0.1129    |
| Flack parameter               | -0.018(4) |

---

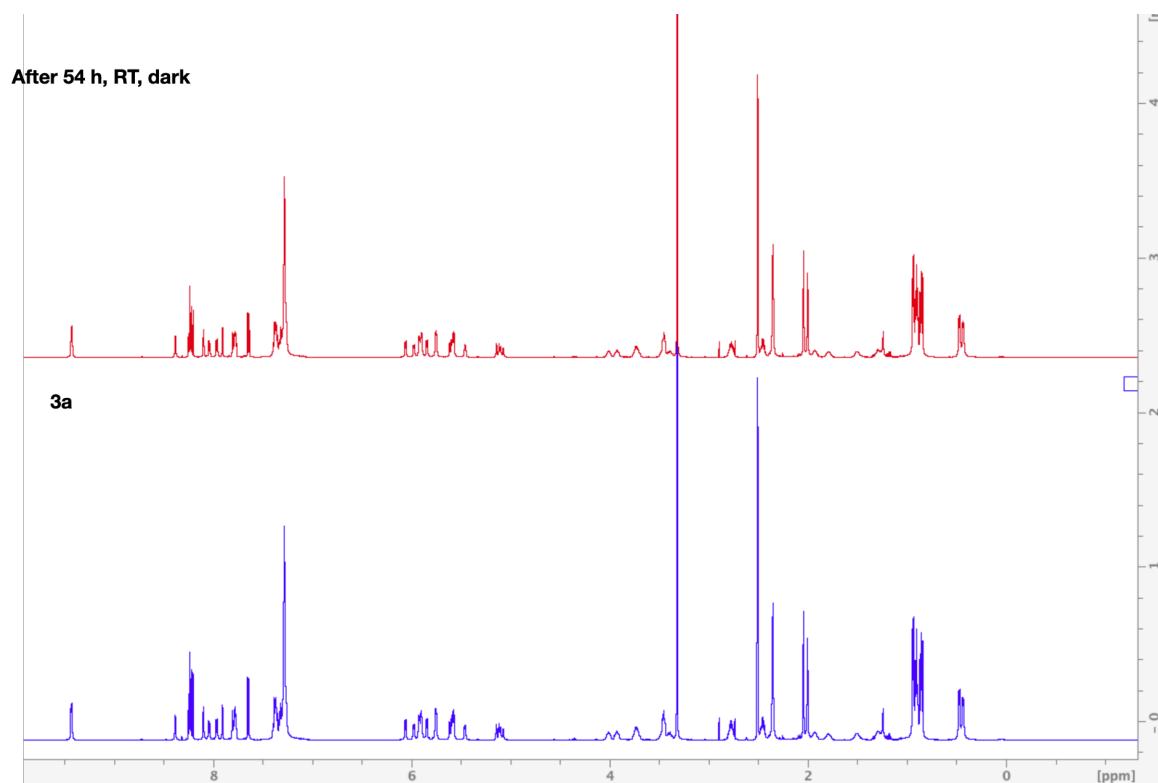

**Supporting Figure S16.**  $^1\text{H}$  NMR spectra of **3a** in  $\text{DMSO-d}_6$  - comparing fresh solution (blue) and solution after 54 h (red) at room temperature

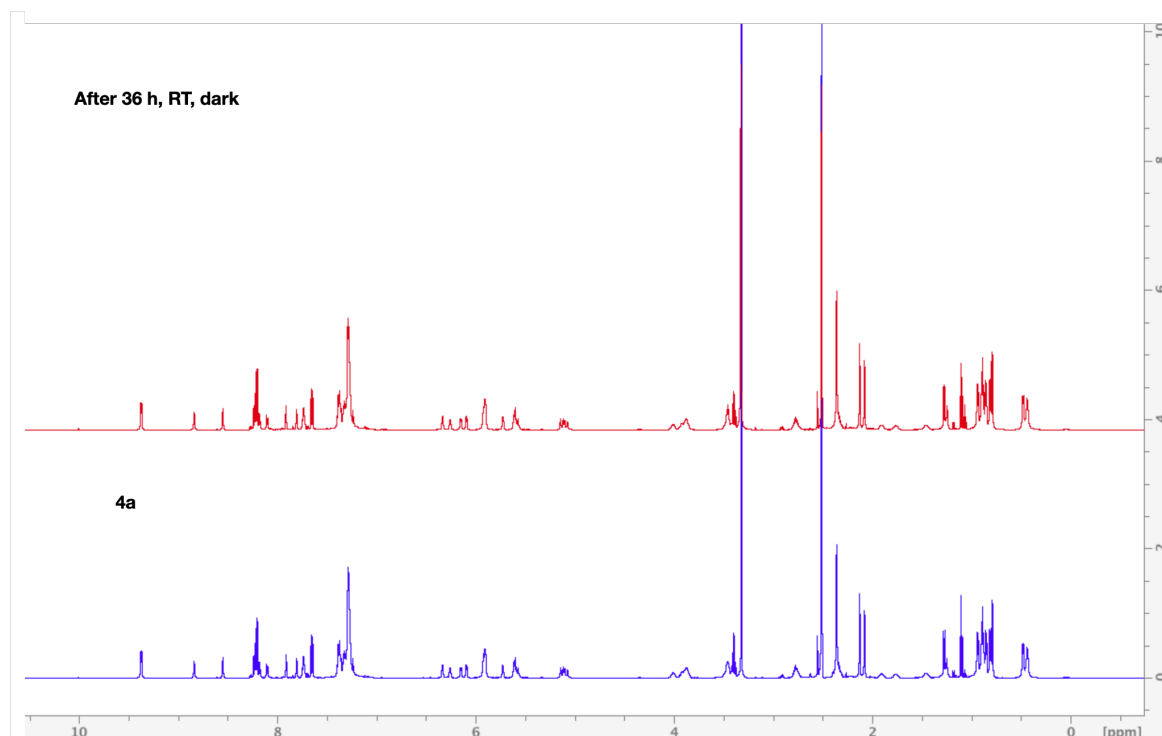

**Supporting Figure S17.**  $^1\text{H}$  NMR spectra of **4a** in  $\text{DMSO-d}_6$  - comparing fresh solution (blue) and solution after 36 h (red) at room temperature

## ESI-MS analysis of the complexes in DMSO solution

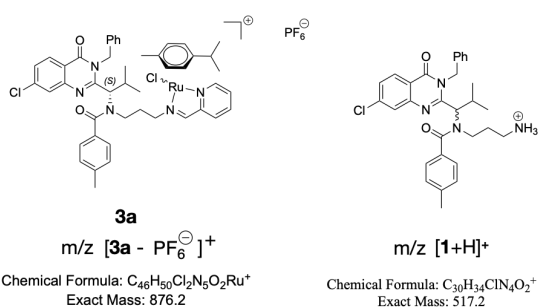

### ESI-MS Analysis of 3a in DMSO - direct injection

t = 0 min    m/z extracted from TIC chromatogram

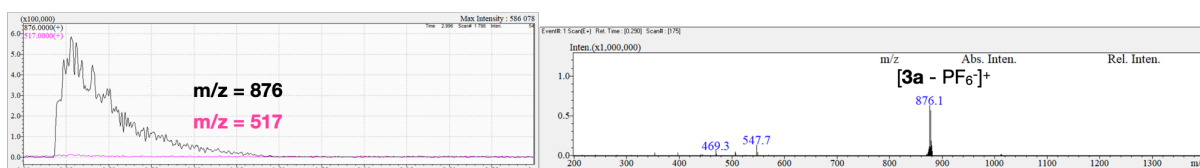

t = 24 h

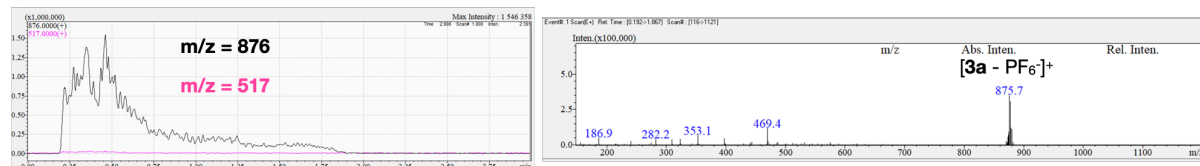

Supporting Figure S18. ESI-MS analysis of **3a** in DMSO solution after 0 and 24 h.

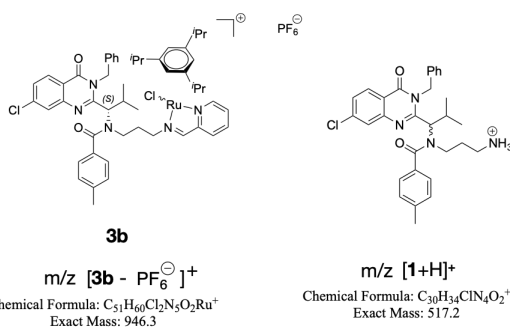

### ESI-MS Analysis of 3b in DMSO - direct injection

t = 0 min    m/z extracted from TIC chromatogram

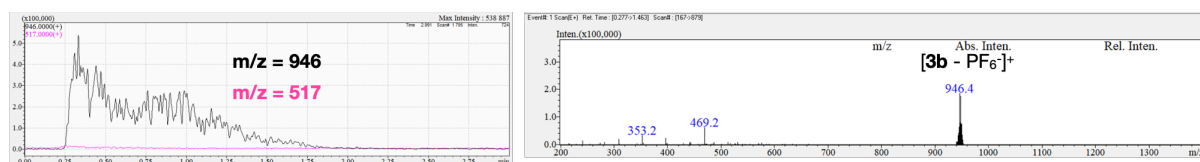

t = 24 h

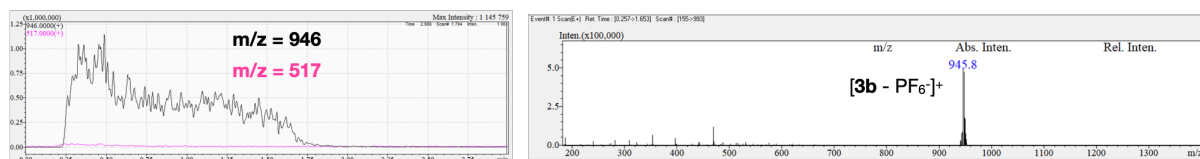

Supporting Figure S19. ESI-MS analysis of **3b** in DMSO solution after 0 and 24 h.

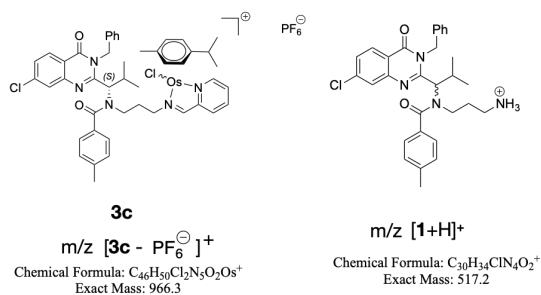

**ESI-MS Analysis of 3c in DMSO - direct injection**

**t = 0 min**  $m/z$  extracted from TIC chromatogram

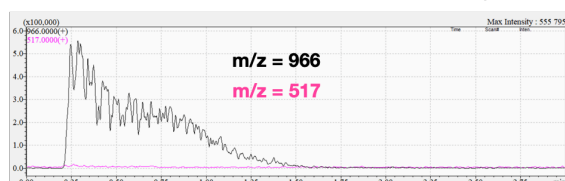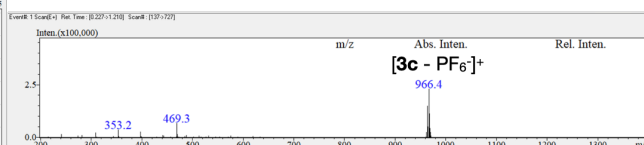

**t = 24 h**

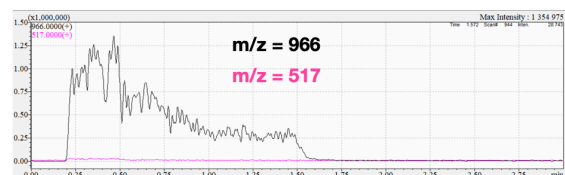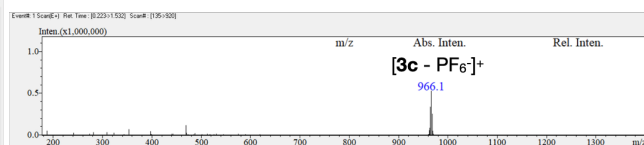

**Supporting Figure S20.** ESI-MS analysis of **3c** in DMSO solution after 0 and 24 h.

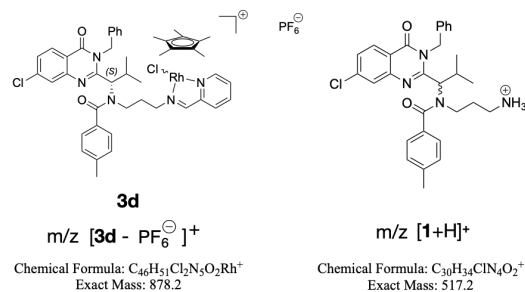

**ESI-MS Analysis of 3d in DMSO - direct injection**

**t = 0 min**  $m/z$  extracted from TIC chromatogram

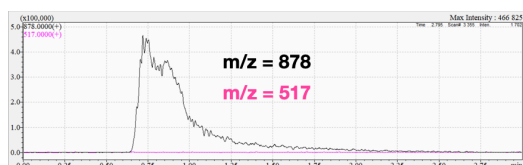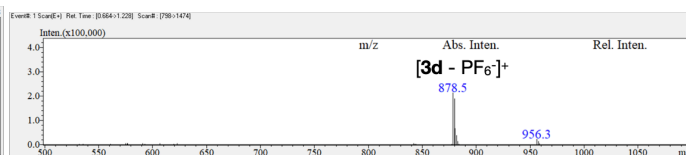

**t = 48 h**

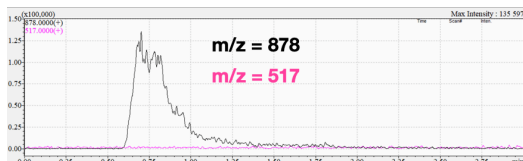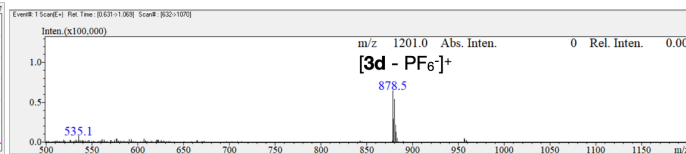

**Supporting Figure S21.** ESI-MS analysis of **3d** in DMSO solution after 0 and 48 h.

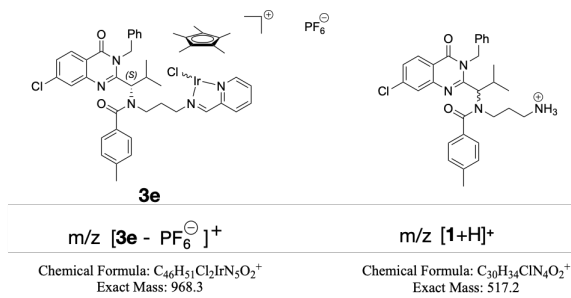

**ESI-MS Analysis of 3e in DMSO - direct injection**

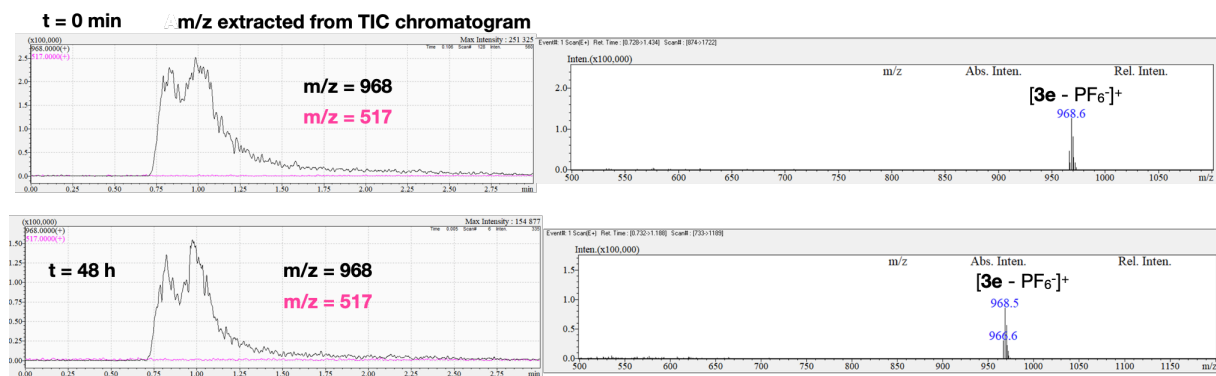

**Supporting Figure S22.** ESI-MS analysis of **3e** in DMSO solution after 0 and 48 h.

## Stability in DMEM – UV-VIS analysis

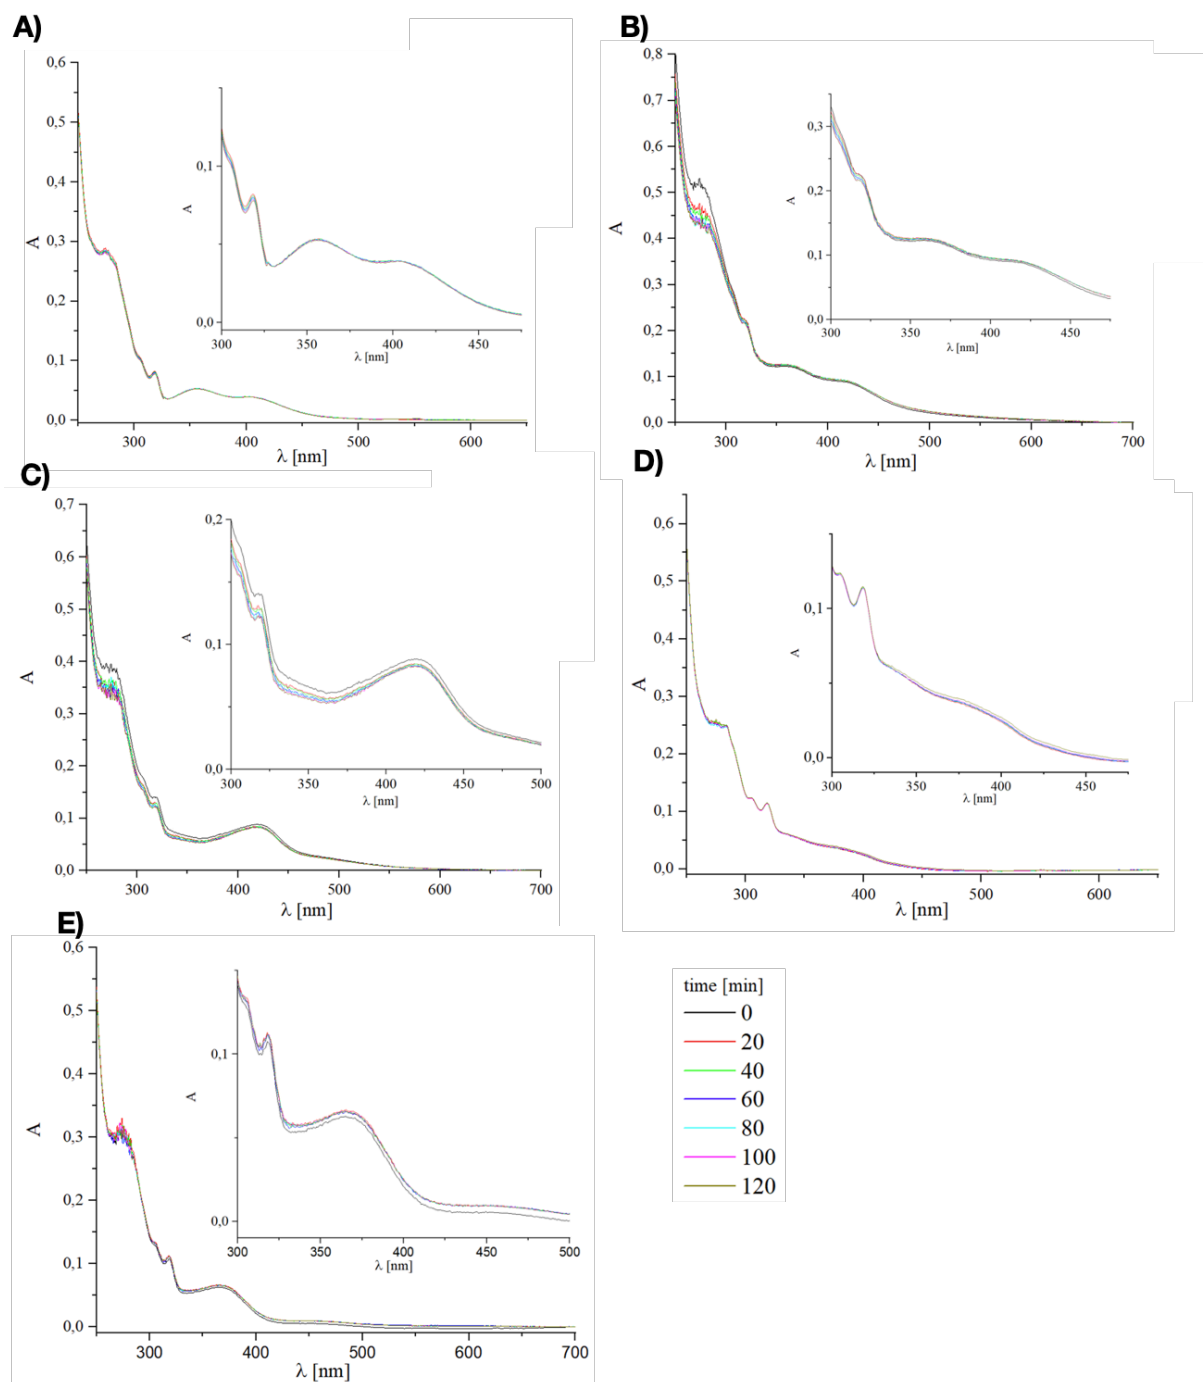

**Supporting Figure S23.** UV-VIS spectra of compounds **3a** (A), **3b** (B), **3c** (C), **3d** (D) and **3e** (E) in DMEM at  $c = 10 \mu\text{M}$ .

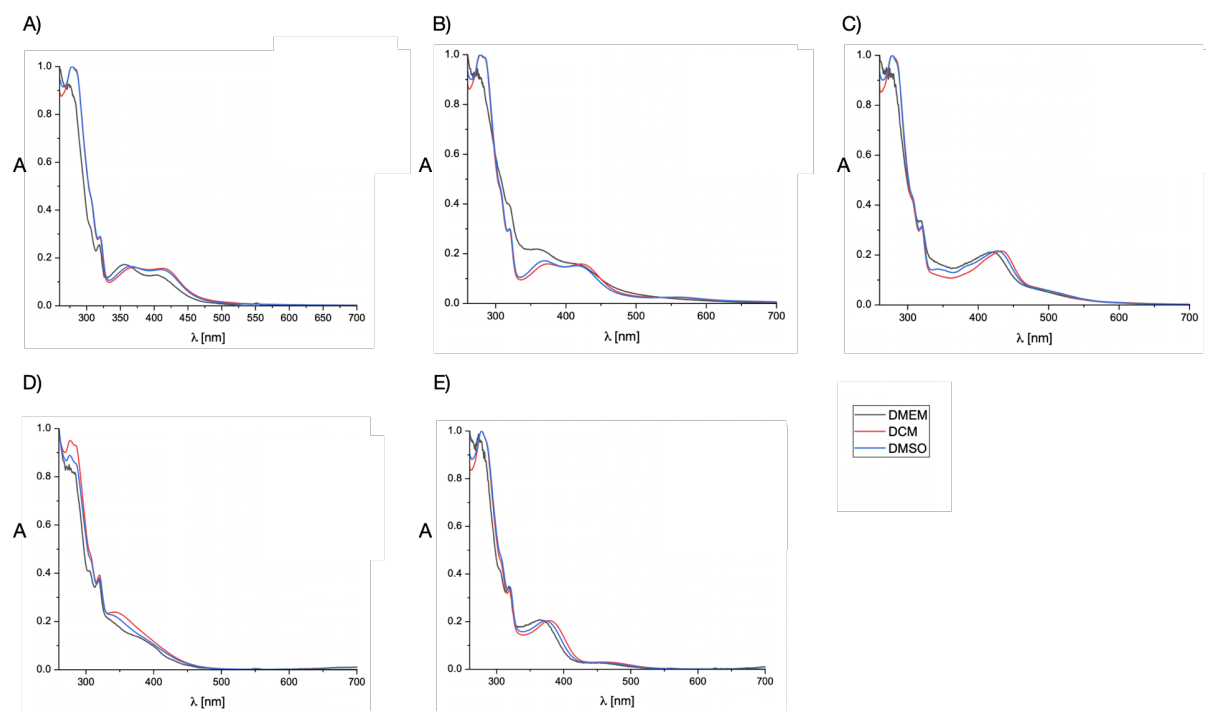

**Supporting Figure S24.** Normalized UV-VIS spectra of compounds **3a** (A), **3b** (B), **3c** (C), **3d** (D) and **3e** (E) in DMEM, DCM and DMSO.



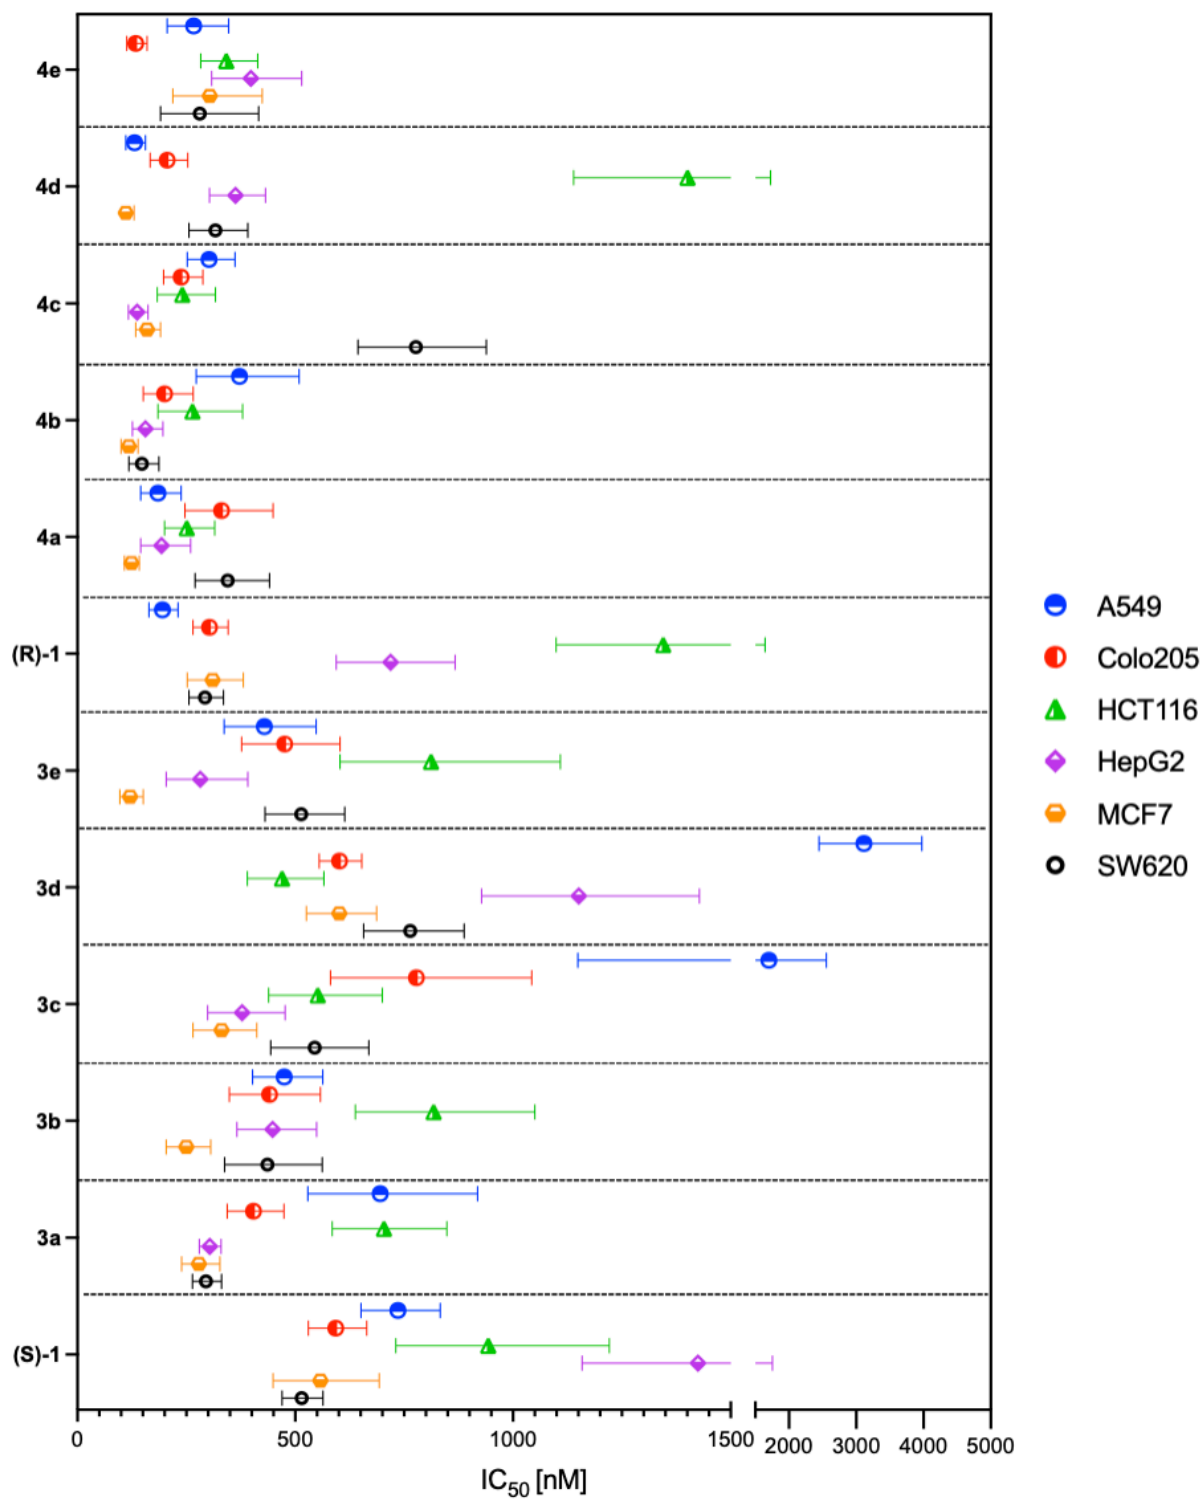

**Supporting Figure S25.** Graphical presentation of IC<sub>50</sub> values of (S)-1 and (R)-1 derivatives obtained for investigated cancer cell lines. IC<sub>50</sub> values are presented along with the corresponding 95% confidence intervals, n = 3;

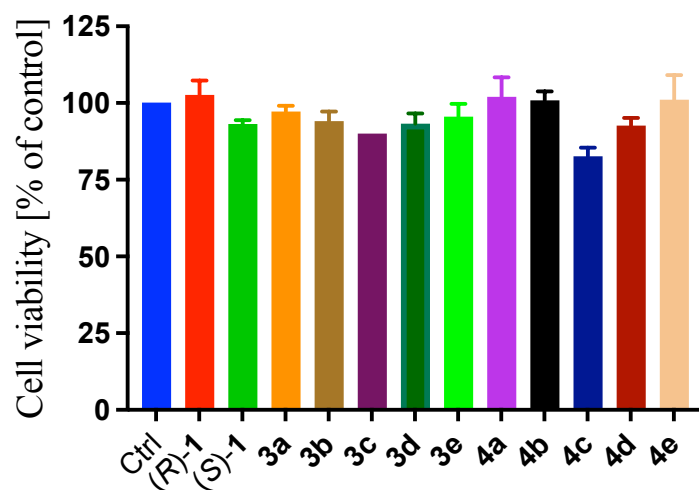

**Supporting Figure S26.** MRC-5 cells viability in the presence of compounds (*S*)- and (*R*)-1 and **3a-4e** at concentrations equal to IC<sub>50</sub> values determined for MCF-7 cells. Values are presented as mean ± SEM, n = 3;

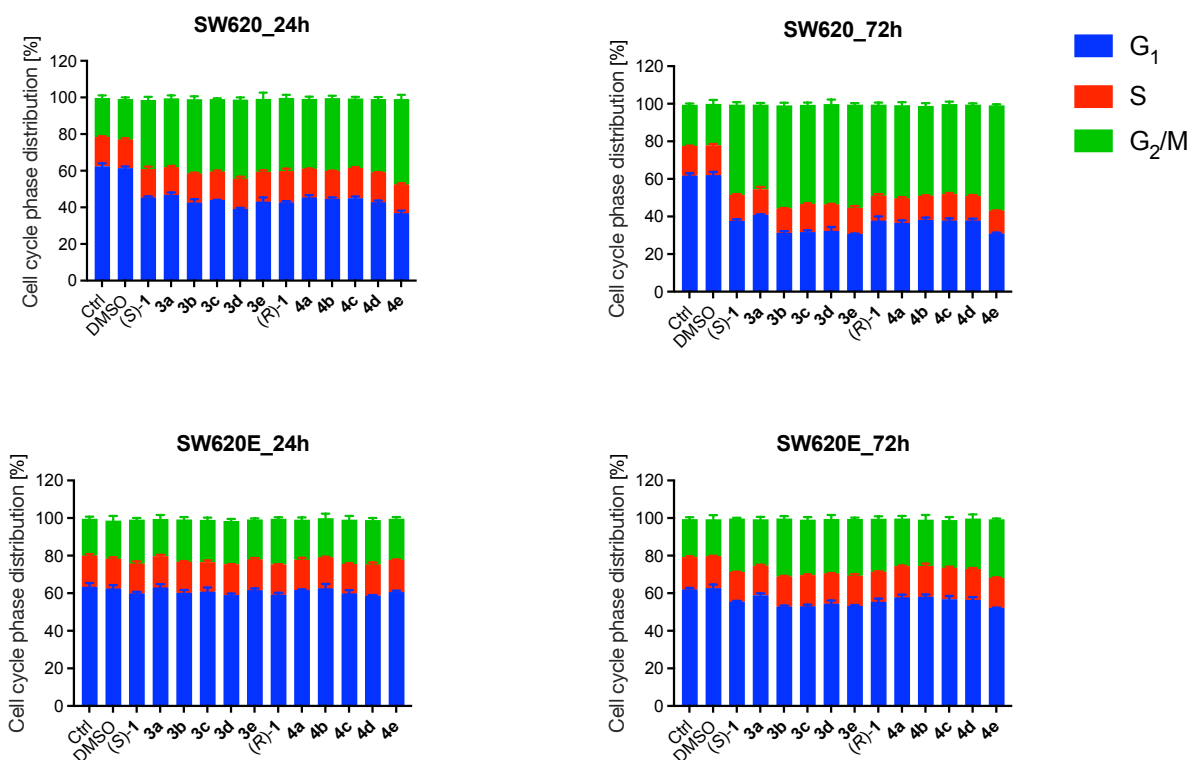

**Figure S27.** Cell cycle phase distribution for SW620 (top) and SW620E (bottom) cells exposed for 24 h and 72 h to (*S*)-**1** and (*R*)-**1** and the corresponding synthesized metal complexes **3a-4e** at concentrations equal to IC<sub>75</sub> of (*S*)- and (*R*)-**1**, respectively. Data are presented as mean ± SEM, n = 3.

## Molecular Modelling

The compounds were docked to the crystal structure of human kinesin KSP (PDB ID: 4AP0, resolution 2.59 Å)<sup>1</sup> which was obtained from the Protein Data Bank (PDB).<sup>2,3</sup> Scigress version FJ 2.6<sup>4</sup> was used to prepare the crystal structure for docking, i.e., hydrogen atoms were added and the co-crystallized ispinesib and adenosine-5'-diphosphate (ADP) were removed. The center of the binding pocket was defined as the nitrogen in the ring close to the carbonyl group. ( $x = 41.663, y = 0.113, z = 11.931$ ) with a radius of 10 Å. The GoldScore (GS),<sup>5</sup> ChemScore (CS)<sup>6,7</sup>, ChemPLP<sup>8</sup> and Astex statistical potential (ASP)<sup>9</sup> scoring functions were implemented to validate the predicted binding modes and relative energies of the compounds using the GOLD v5.4 software suite. The co-crystallized molecule ispinesib was first docked and root mean square deviation (RMSD) values were calculated for the heavy atoms. ASP obtained an average RMSD of 0.9255, the score for PLP was 0.7299, for CS 0.7265 and GS gave a RMSD of 0.8090 which show the strong prediction power of the scoring functions (Supporting Tables S2 and S3).

**Supporting Table S2.** RMSD values for heavy atoms between the co-crystallized ispinesib and the docked molecule.

| Poses | ASP    | ChemPLP | CS     | GS     |
|-------|--------|---------|--------|--------|
| 1     | 0.9569 | 0.5933  | 0.6412 | 1.0677 |
| 2     | 0.8536 | 0.8291  | 0.6083 | 0.4090 |
| 3     | 0.9660 | 0.7674  | 0.9299 | 0.9503 |
| Mean  | 0.9255 | 0.7299  | 0.7265 | 0.8090 |

**Supporting Table S3.** Results of the scoring function for the docking of the compounds to KSP.

| <b>Compound</b>                             | <b>ASP</b> | <b>ChemPLP</b> | <b>ChemScore</b> | <b>GoldScore</b> |
|---------------------------------------------|------------|----------------|------------------|------------------|
| ispinesib                                   | 48.7       | 109.6          | 42.6             | 83.4             |
| <b>(R)-1a</b>                               | 49.0       | 111.3          | 43.9             | 79.7             |
| <b>(S)-1a</b>                               | 40.0       | 87.3           | 37.1             | 70.8             |
| <hr style="border-top: 1px dashed black;"/> |            |                |                  |                  |
| <b>3a<sup>S,RRu</sup></b>                   | 33.0       | 89.5           | 38.0             | 63.2             |
| <b>3a<sup>S,SRu</sup></b>                   | 35.1       | 84.9           | 34.3             | 74.3             |
| <b>3c<sup>S,ROs</sup></b>                   | 38.3       | 92.9           | 38.8             | 62.8             |
| <b>3c<sup>S,SOs</sup></b>                   | 35.7       | 89.4           | 34.3             | 59.4             |
| <b>3d<sup>S,SRh</sup></b>                   | 39.8       | 90.6           | 35.2             | 73.8             |
| <b>3d<sup>S,RRh</sup></b>                   | 40.1       | 83.1           | 35.6             | 56.1             |
| <b>3e<sup>S,Slr</sup></b>                   | 38.8       | 90.6           | 36.6             | 75.4             |
| <b>3e<sup>S,Rlr</sup></b>                   | 40.5       | 88.3           | 38.8             | 54.8             |
| <hr style="border-top: 1px dashed black;"/> |            |                |                  |                  |
| <b>4a<sup>R,SRu</sup></b>                   | 41.4       | 90.4           | 35.5             | 79.3             |
| <b>4a<sup>R,RRu</sup></b>                   | 39.6       | 91.0           | 36.9             | 75.6             |
| <b>4c<sup>R,SOs</sup></b>                   | 40.2       | 95.2           | 37.0             | 67.7             |
| <b>4c<sup>R,ROs</sup></b>                   | 39.7       | 93.4           | 37.9             | 65.0             |
| <b>4d<sup>R,RRh</sup></b>                   | 36.3       | 81.9           | 36.1             | 68.1             |
| <b>4d<sup>R,SRh</sup></b>                   | 37.5       | 87.2           | 35.7             | 64.4             |
| <b>4e<sup>R,Rlr</sup></b>                   | 38.5       | 84.8           | 34.6             | 68.2             |
| <b>4e<sup>R,Slr</sup></b>                   | 38.8       | 87.5           | 34.3             | 64.9             |

## Copies of NMR spectra

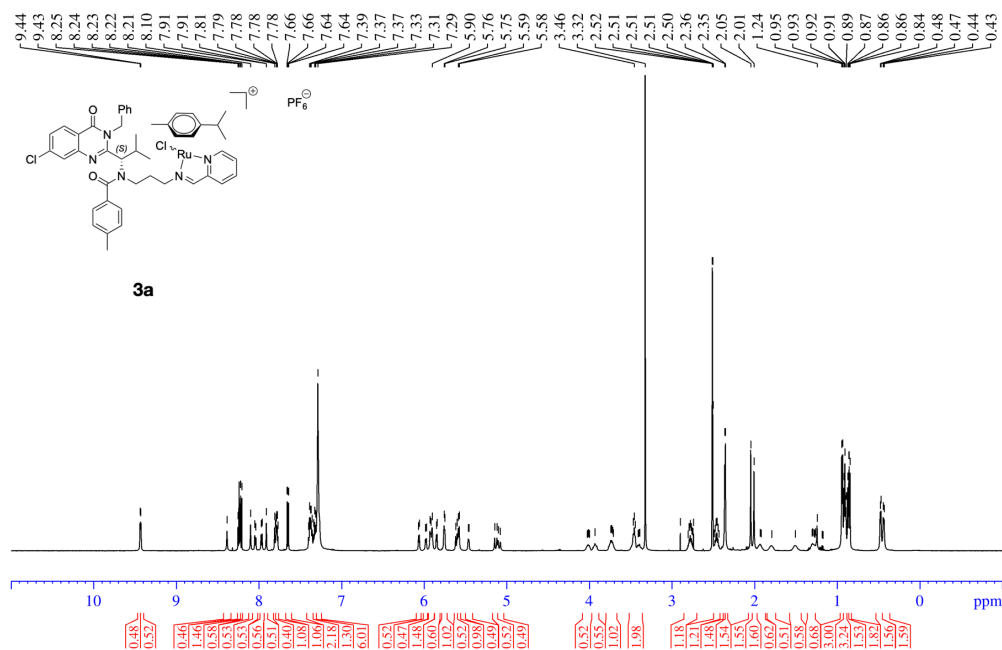

Supporting Figure S28.  $^1\text{H}$  NMR of **3a** in DMSO- $d_6$

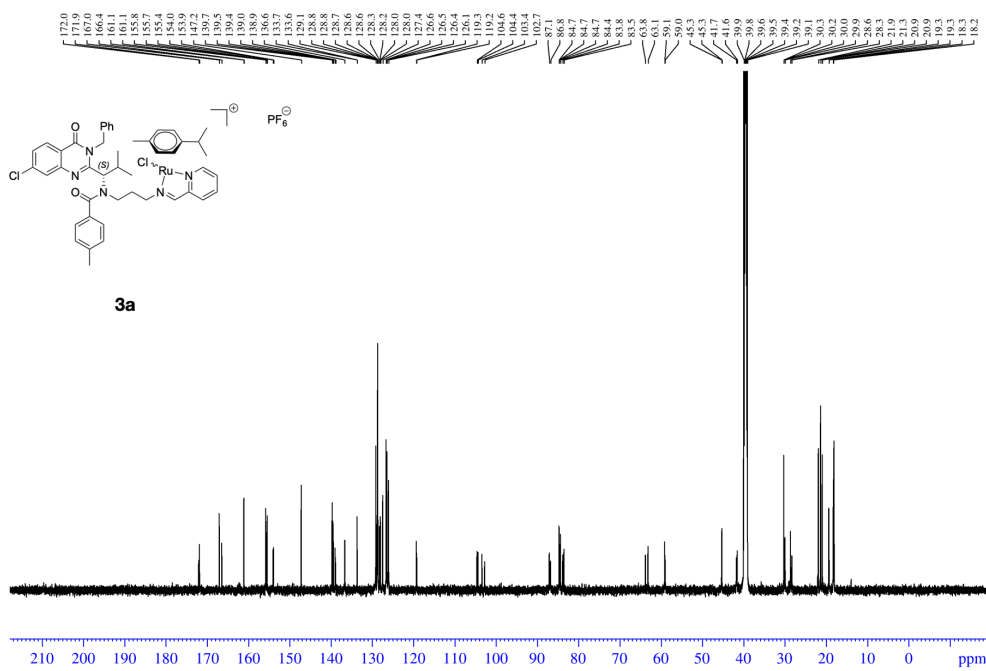

Supporting Figure S29.  $^{13}\text{C}$   $\{^1\text{H}\}$  NMR of **3a** in DMSO- $d_6$

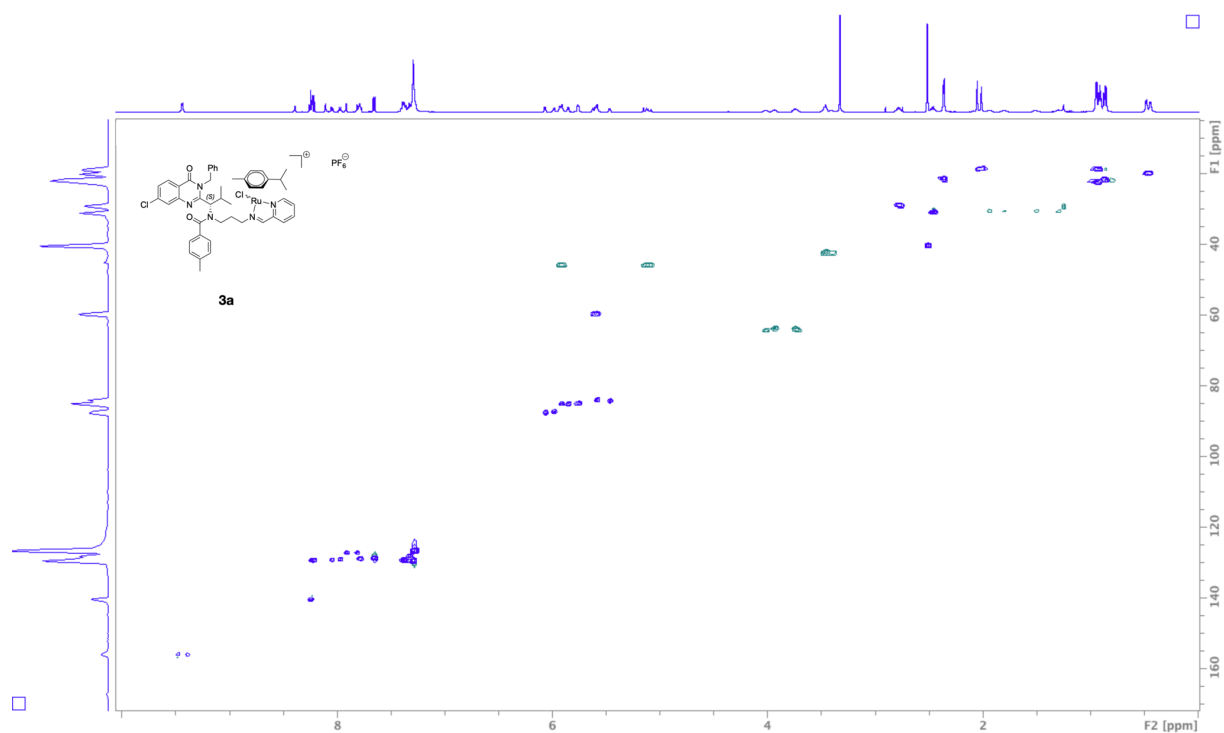

Supporting Figure S30.  $^1\text{H}$ - $^{13}\text{C}$  HSQC NMR of **3a** in  $\text{DMSO-d}_6$

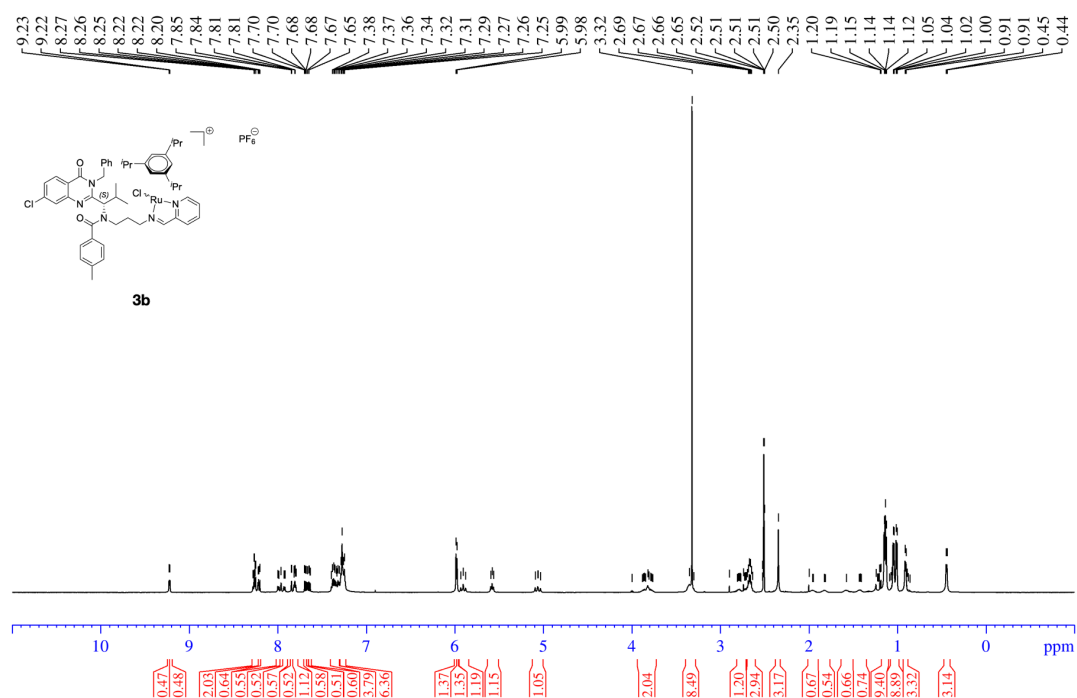

Supporting Figure S31.  $^1\text{H}$  NMR of **3b** in  $\text{DMSO-d}_6$

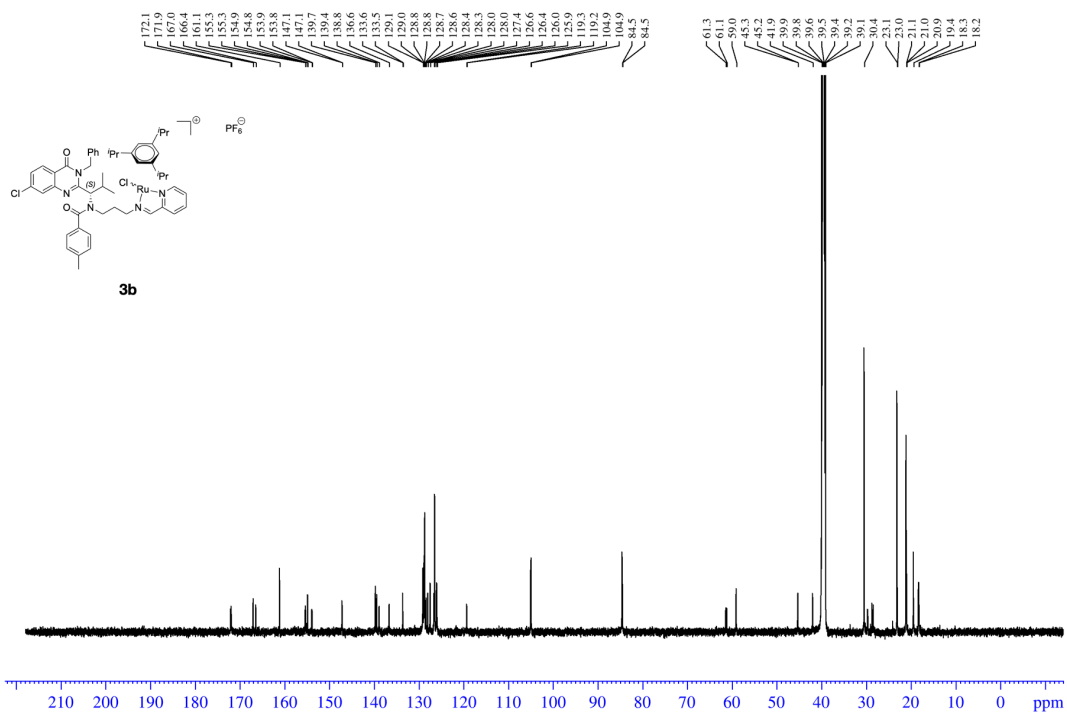

Supporting Figure S32.  $^{13}\text{C}\{^1\text{H}\}$  NMR of **3b** in  $\text{DMSO-d}_6$

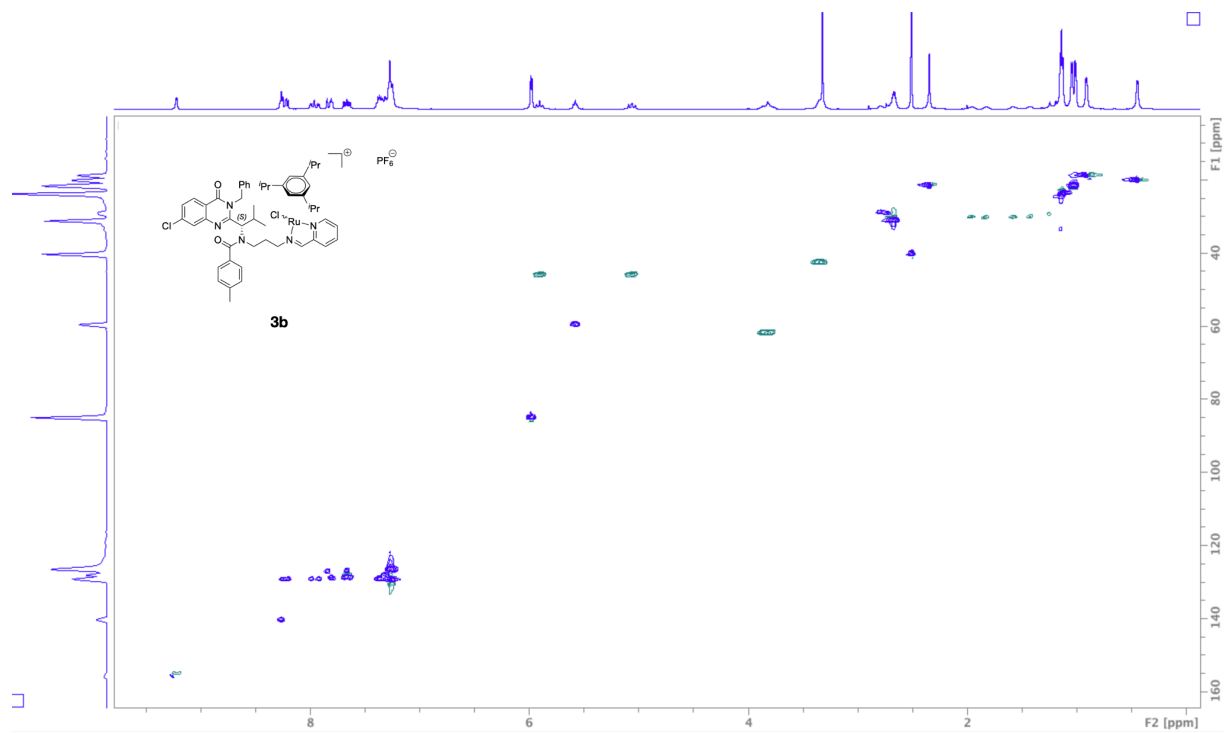

Supporting Figure S33.  $^1\text{H}\text{-}^{13}\text{C}$  HSQC NMR of **3b** in  $\text{CD}_2\text{Cl}_2$



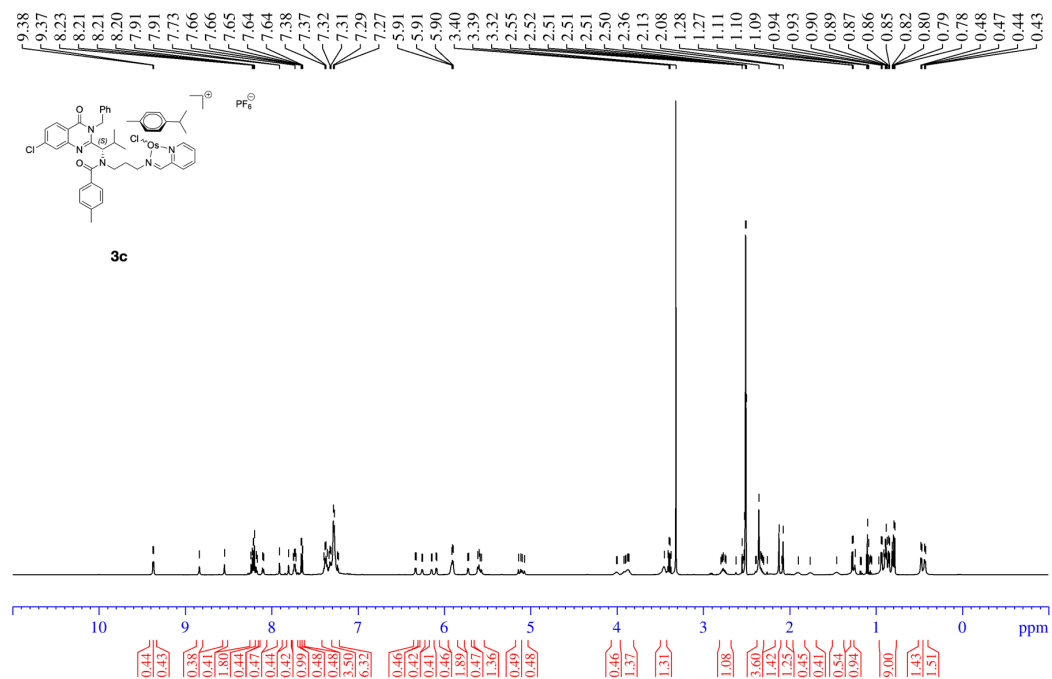

Supporting Figure S34. <sup>1</sup>H NMR of **3c** in DMSO-d<sub>6</sub>

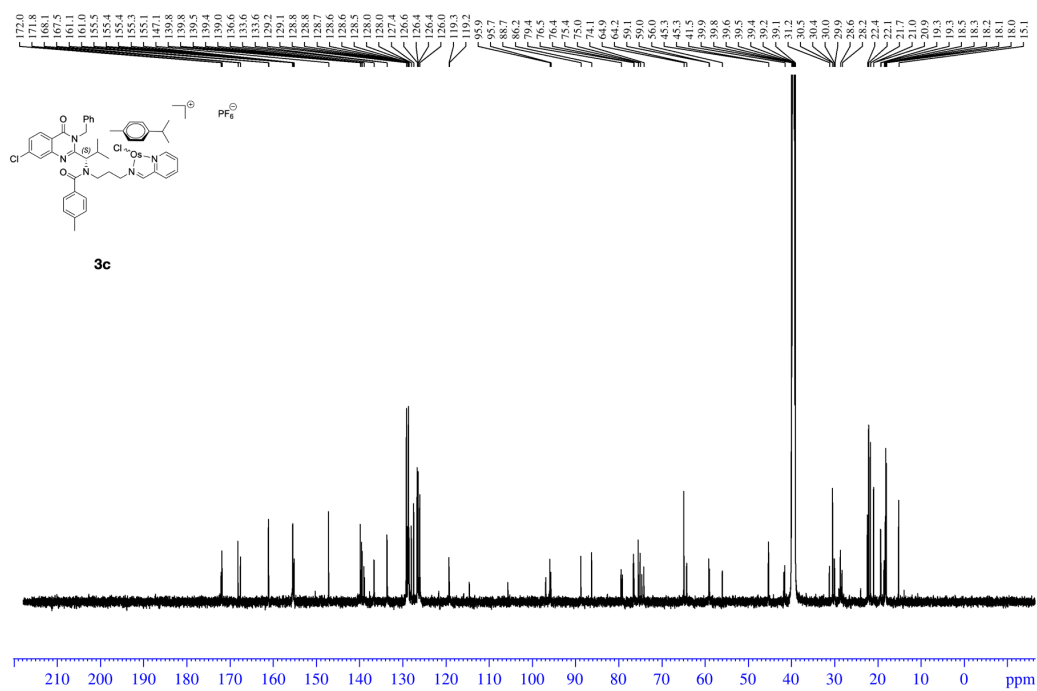

Supporting Figure S35. <sup>13</sup>C{<sup>1</sup>H} NMR of **3c** in DMSO-d<sub>6</sub>

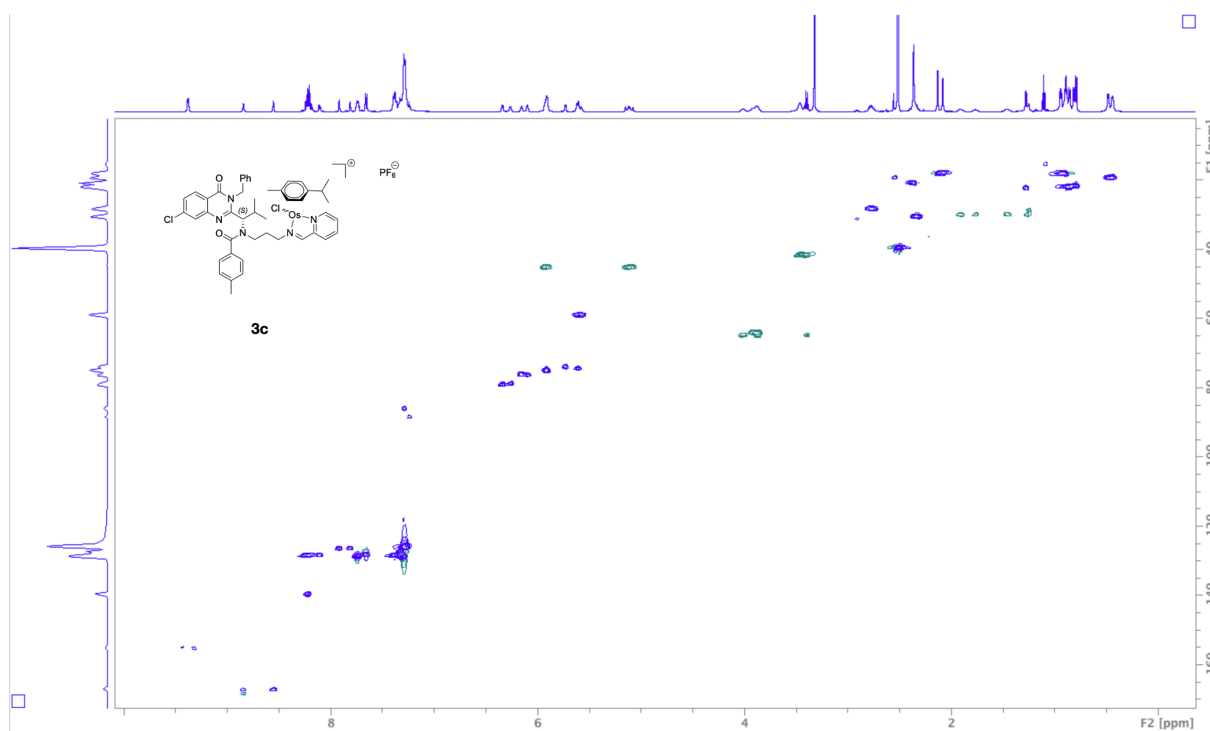

Supporting Figure S36.  $^1\text{H}$ - $^{13}\text{C}$  HSQC NMR of **3c** in  $\text{DMSO-d}_6$

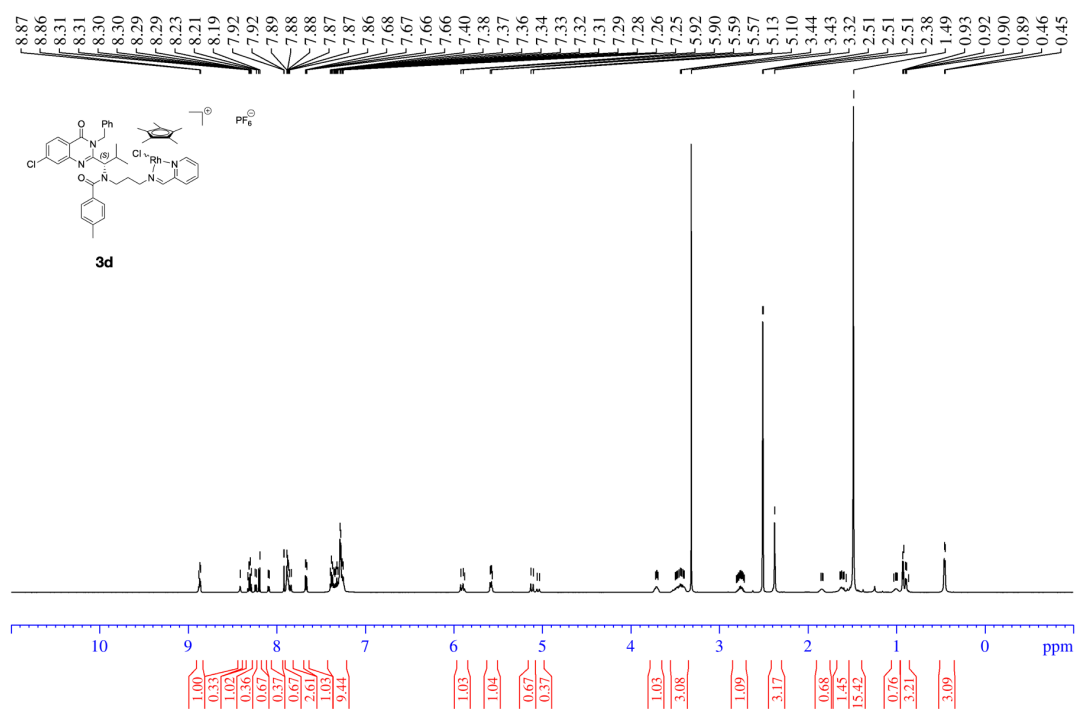

Supporting Figure S37.  $^1\text{H}$  NMR of **3d** in  $\text{DMSO-d}_6$

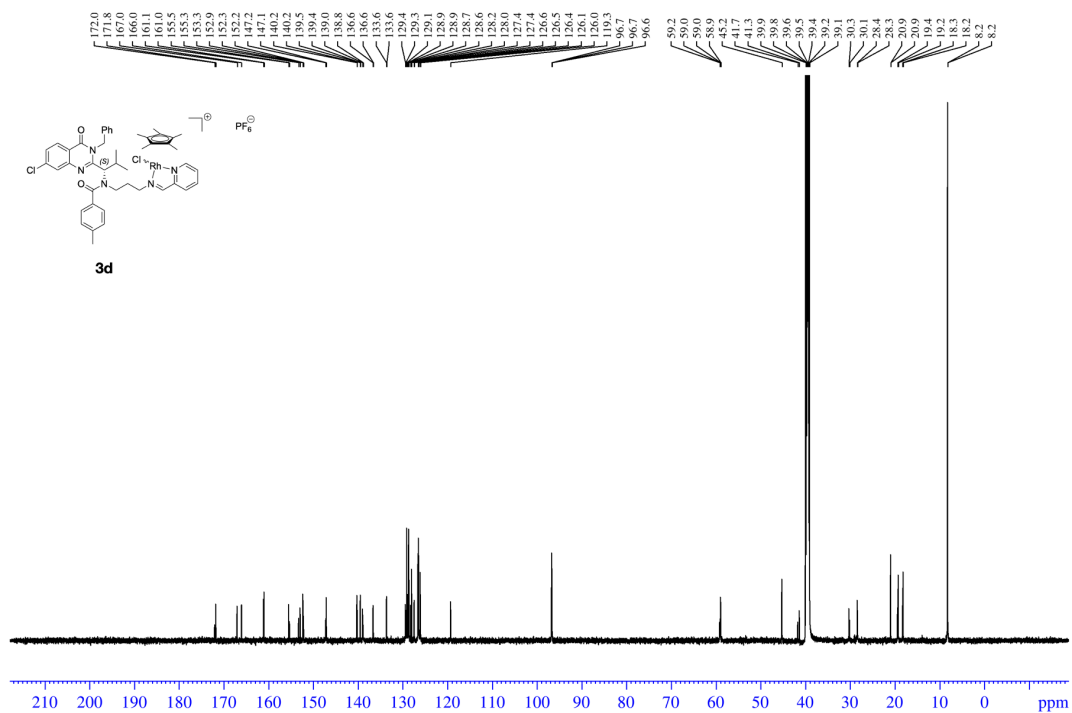

Supporting Figure S38.  $^{13}\text{C}\{^1\text{H}\}$  NMR of **3d** in  $\text{DMSO-d}_6$

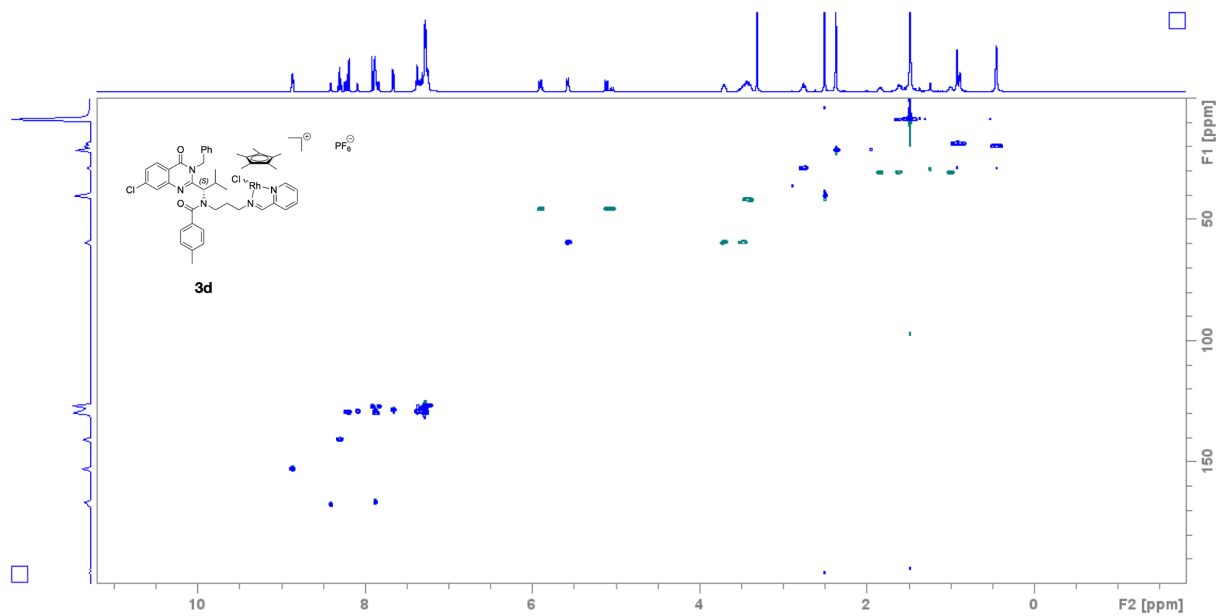

Supporting Figure S39.  $^1\text{H}$ - $^{13}\text{C}$  HSQC NMR of **3d** in  $\text{DMSO-d}_6$

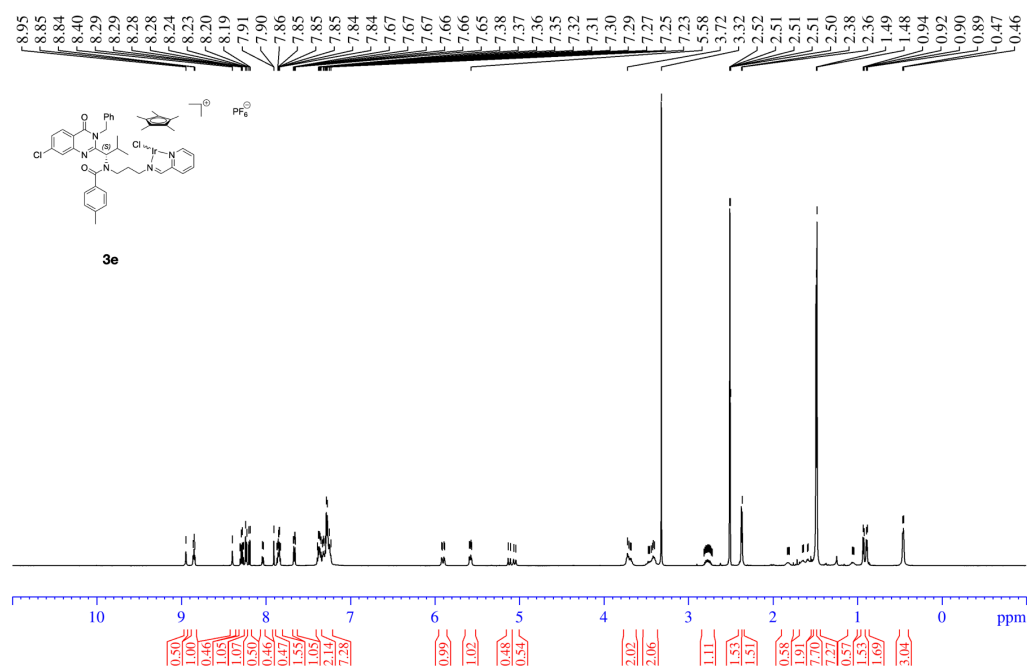

Supporting Figure S40. <sup>1</sup>H NMR of **3e** in DMSO-d<sub>6</sub>

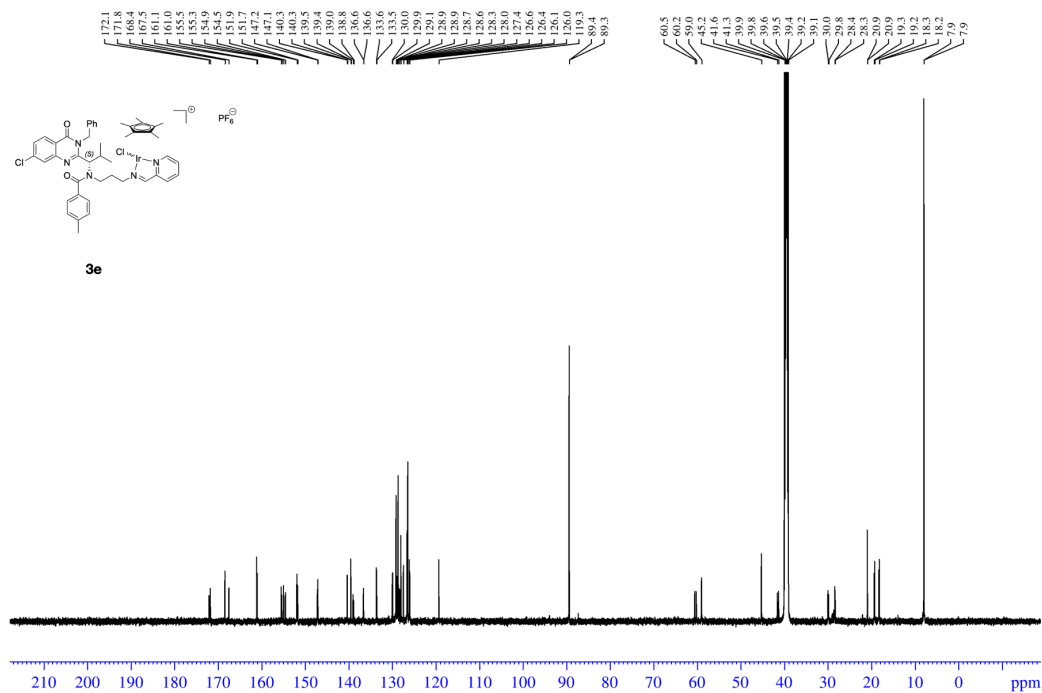

Supporting Figure S41. <sup>13</sup>C{<sup>1</sup>H} NMR of **3e** in DMSO-d<sub>6</sub>

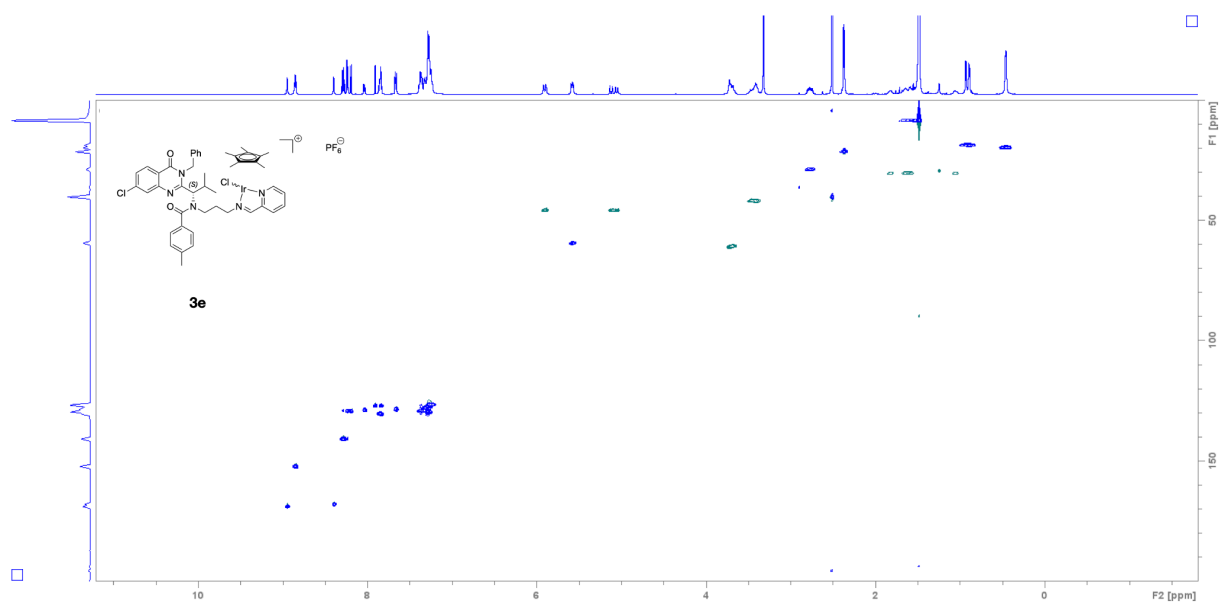

Supporting Figure S42.  $^1\text{H}$ - $^{13}\text{C}$  HSQC NMR of **3e** in  $\text{DMSO-d}_6$

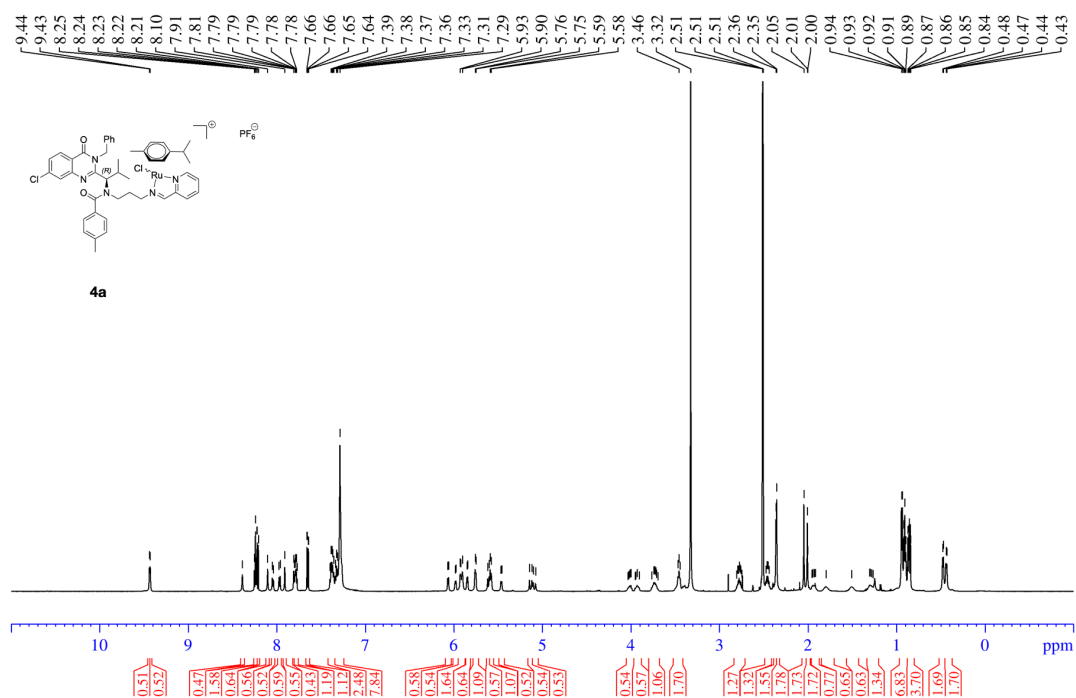

Supporting Figure S43.  $^1\text{H}$  NMR of **4a** in  $\text{DMSO-d}_6$

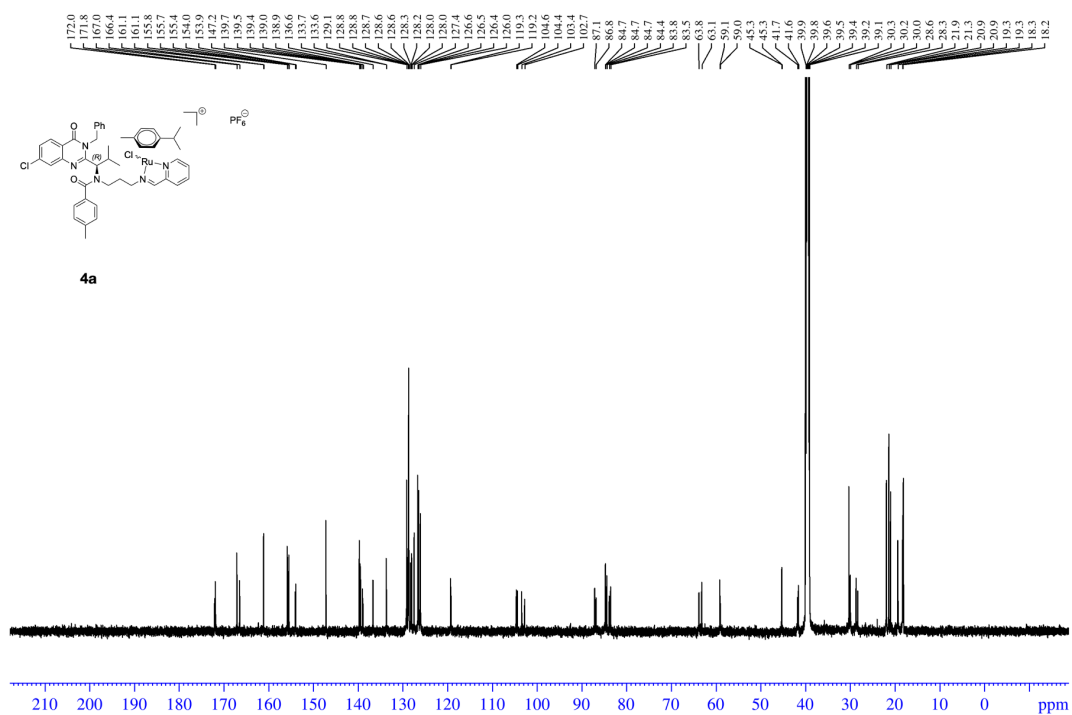

Supporting Figure S44.  $^{13}\text{C}\{^1\text{H}\}$  NMR of **4a** in  $\text{DMSO-d}_6$

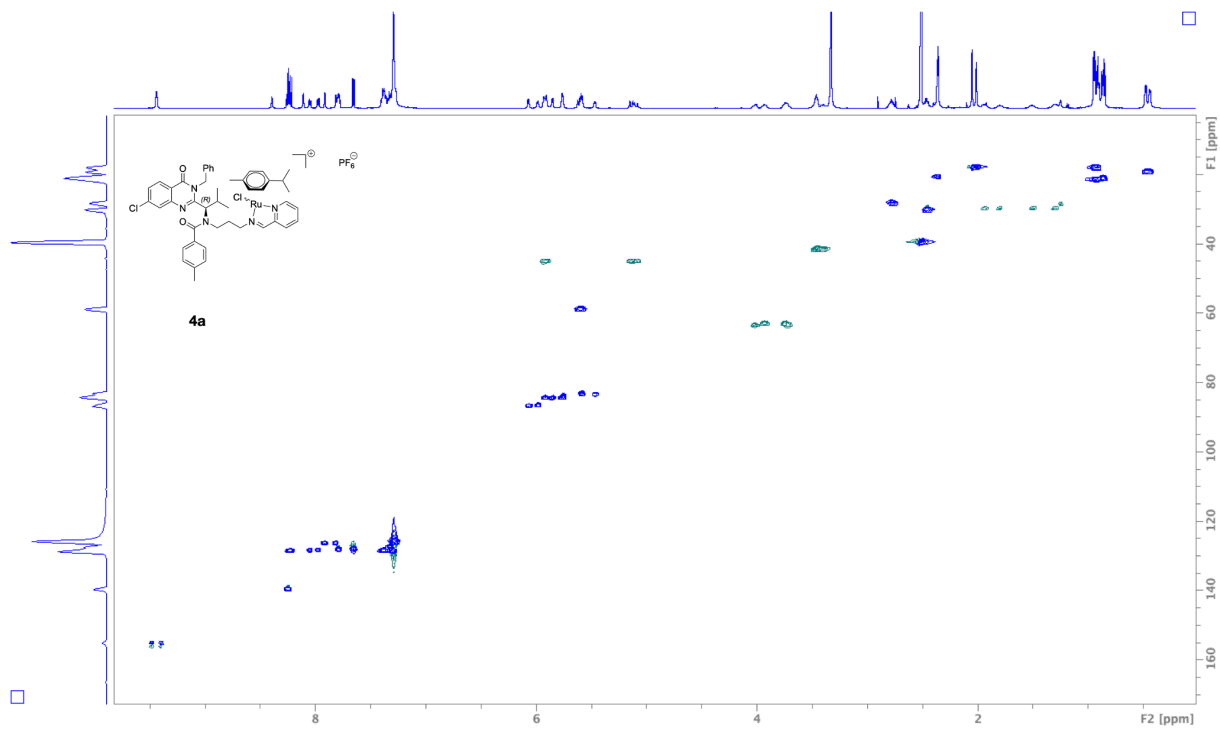

Supporting Figure S45.  $^1\text{H}-^{13}\text{C}$  HSQC NMR of **4a** in  $\text{DMSO-d}_6$

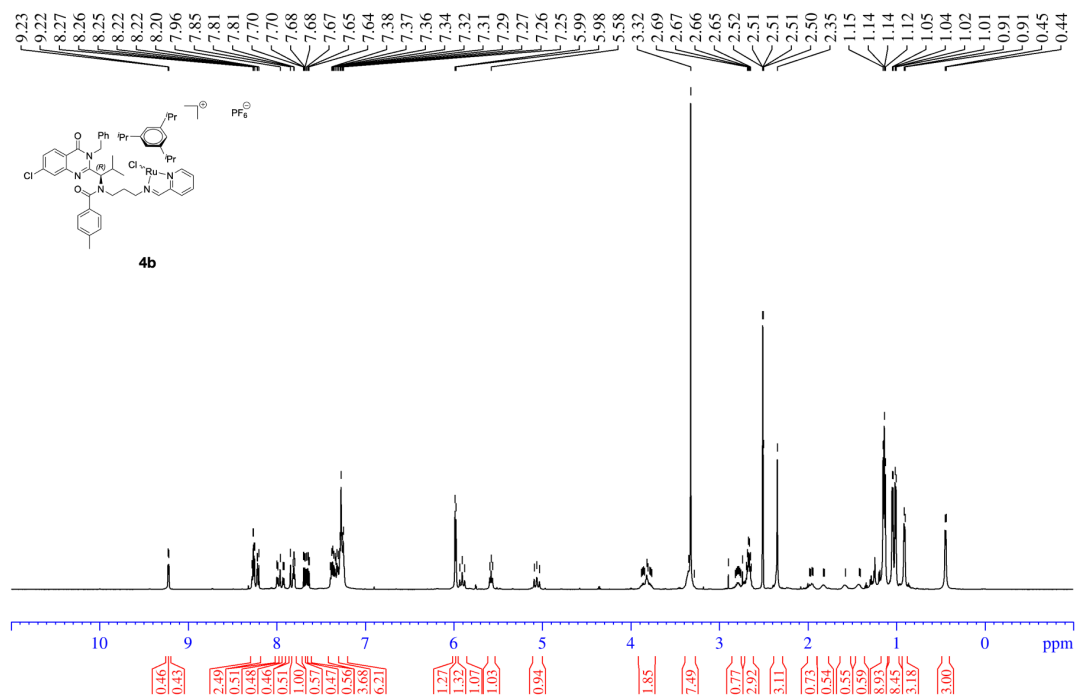

Supporting Figure S46. <sup>1</sup>H NMR of **4b** in DMSO-d<sub>6</sub>

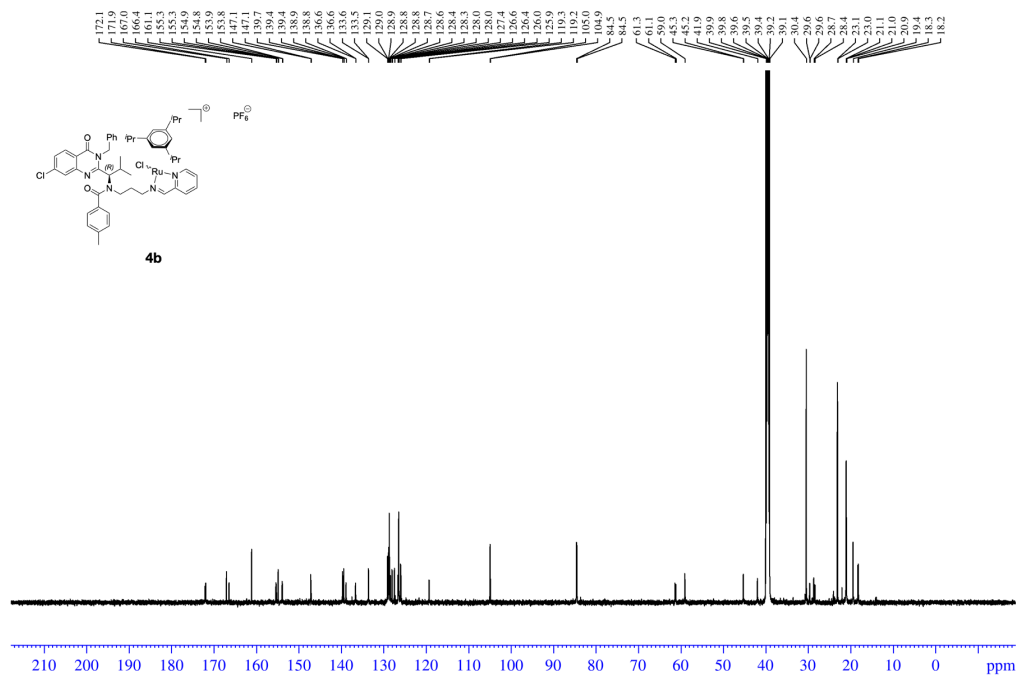

Supporting Figure S47. <sup>13</sup>C {<sup>1</sup>H} NMR of **4b** in DMSO-d<sub>6</sub>

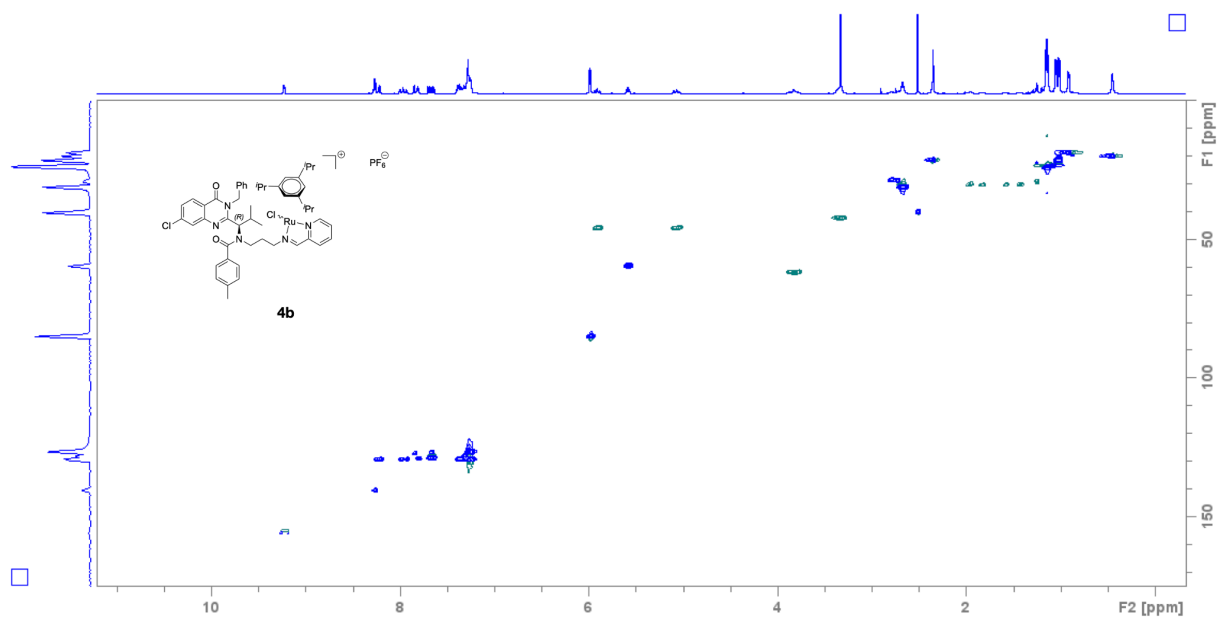

Supporting Figure S48.  $^1\text{H}$ - $^{13}\text{C}$  HSQC NMR of **4b** in  $\text{DMSO-d}_6$

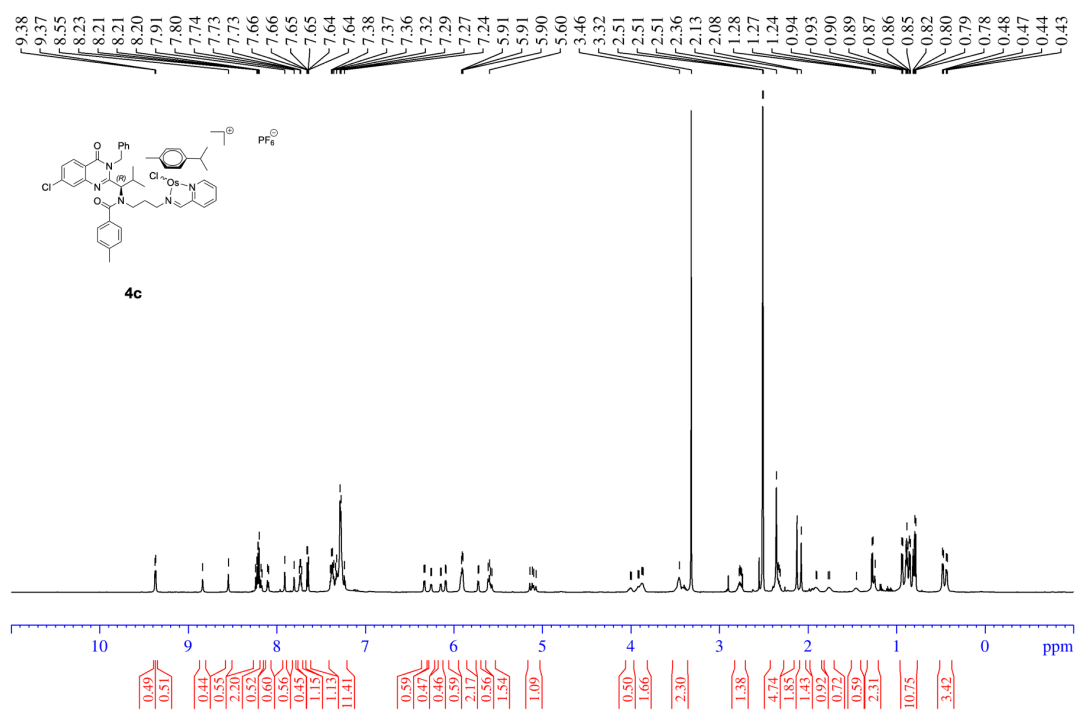

Supporting Figure S49.  $^1\text{H}$  NMR of **4c** in  $\text{DMSO-d}_6$



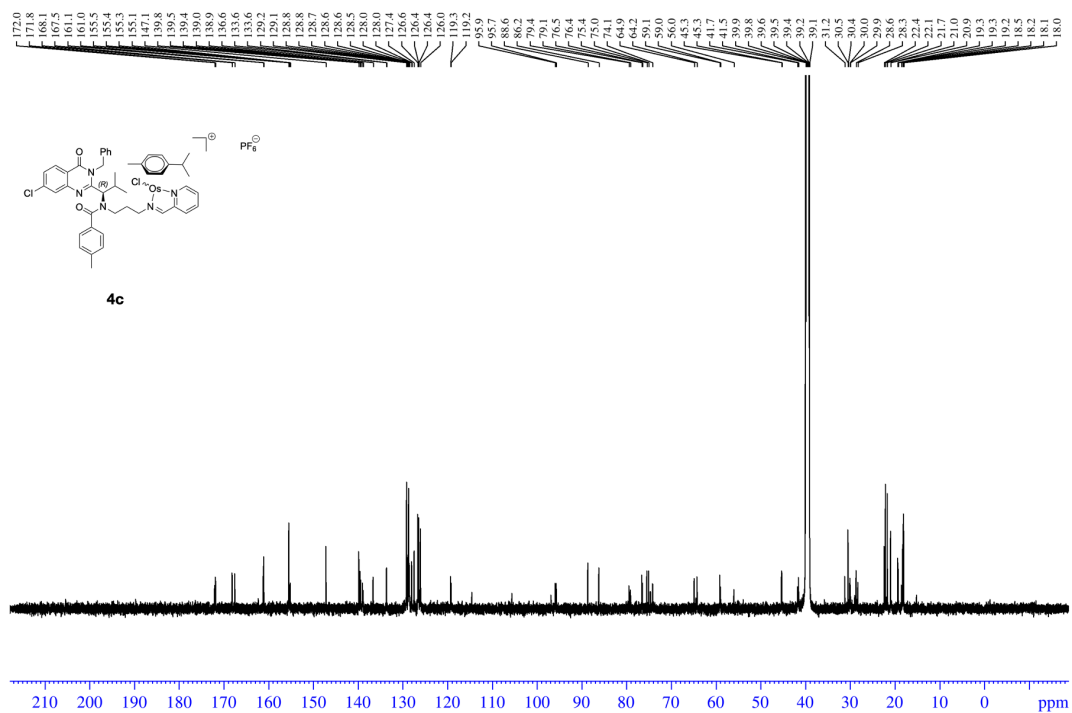

Supporting Figure S50.  $^{13}\text{C}\{^1\text{H}\}$  NMR of **4c** in  $\text{DMSO-d}_6$

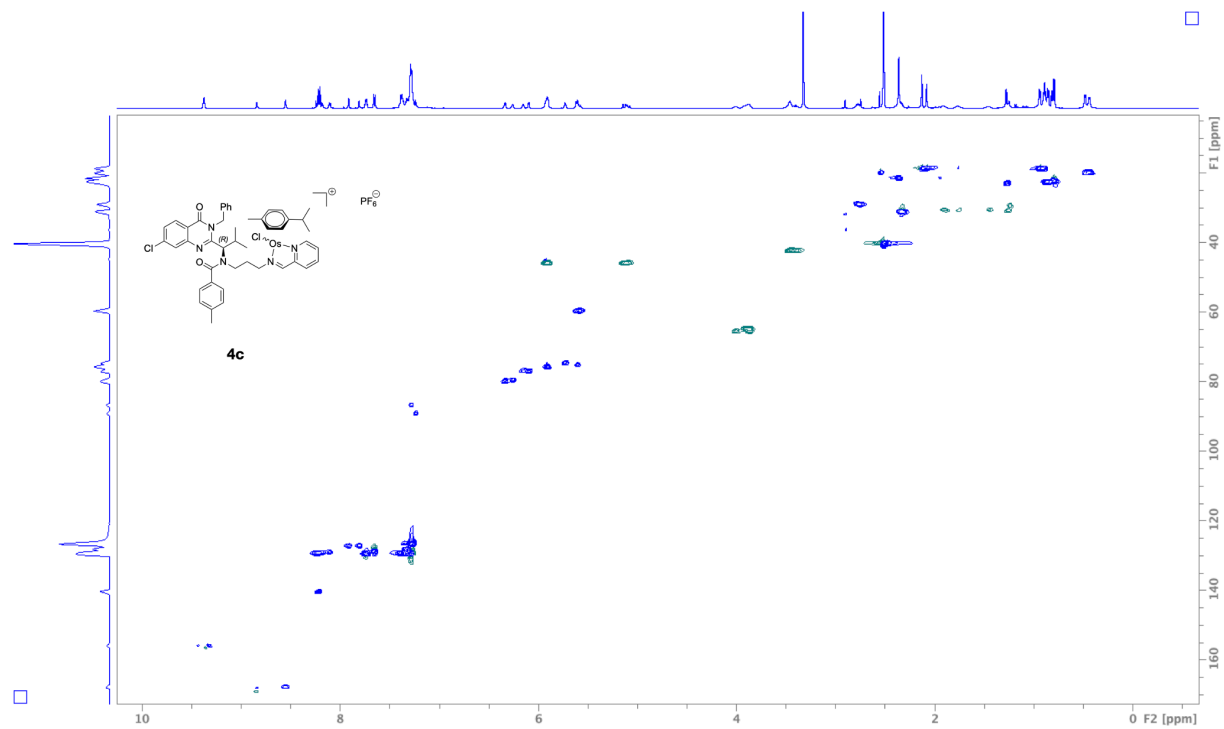

Supporting Figure S51.  $^1\text{H}\text{-}^{13}\text{C}$  HSQC NMR of **4c** in  $\text{DMSO-d}_6$

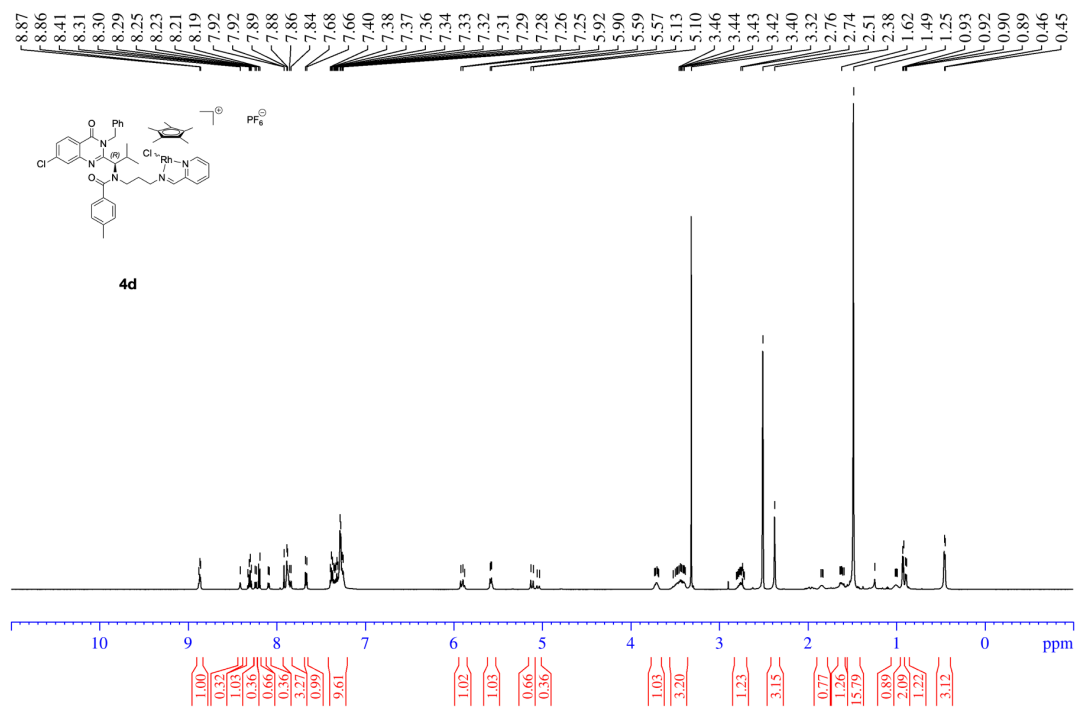

Supporting Figure S52. <sup>1</sup>H NMR of **4d** in DMSO-d<sub>6</sub>

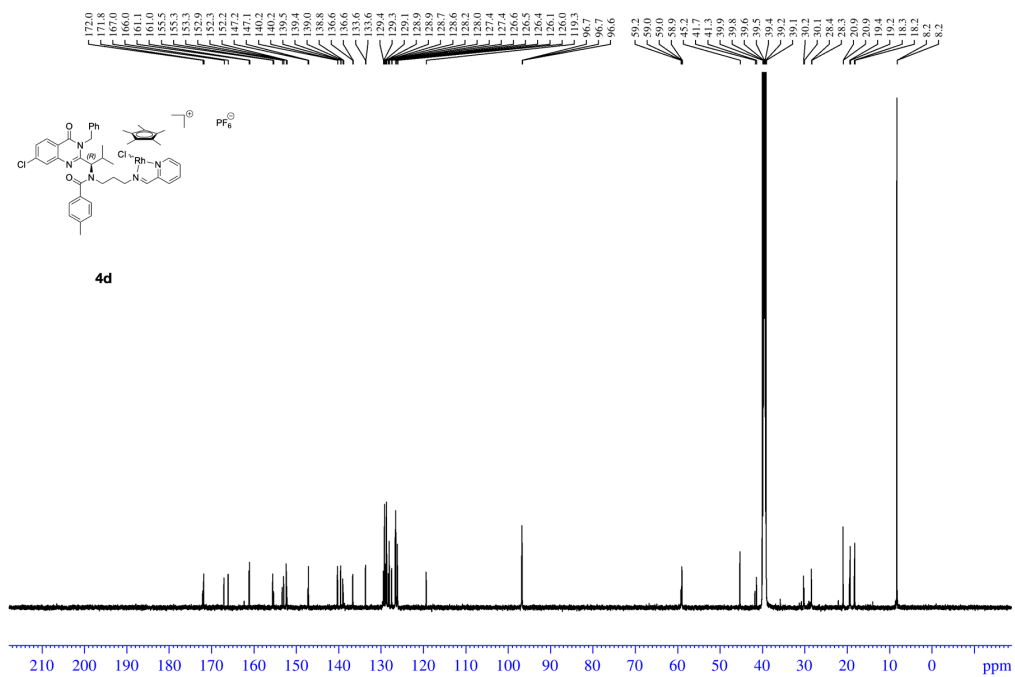

Supporting Figure S53. <sup>13</sup>C{<sup>1</sup>H} NMR of **4d** in DMSO-d<sub>6</sub>

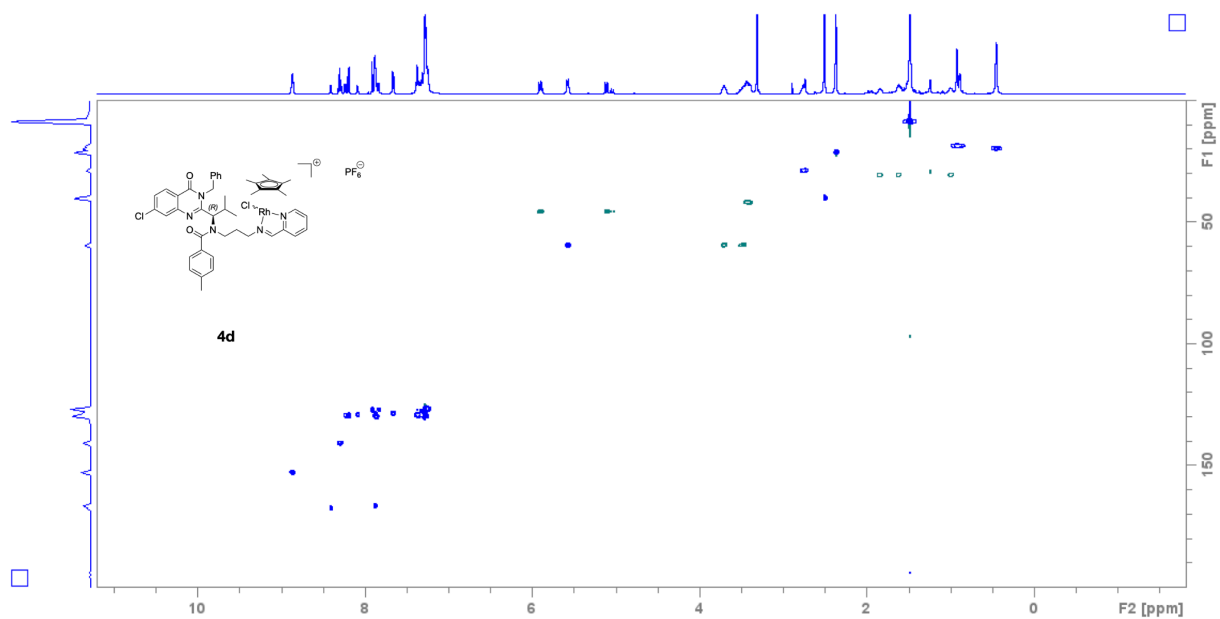

Supporting Figure S54.  $^1\text{H}$ - $^{13}\text{C}$  HSQC NMR of **4d** in  $\text{DMSO-d}_6$

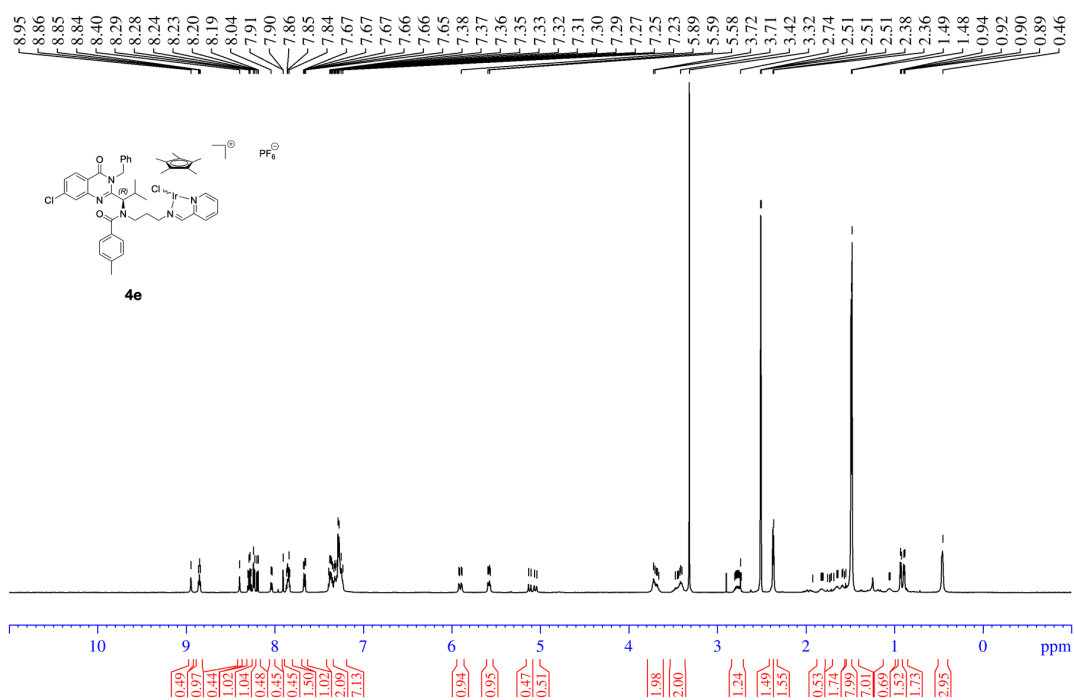

Supporting Figure S55.  $^1\text{H}$  NMR of **4e** in  $\text{DMSO-d}_6$

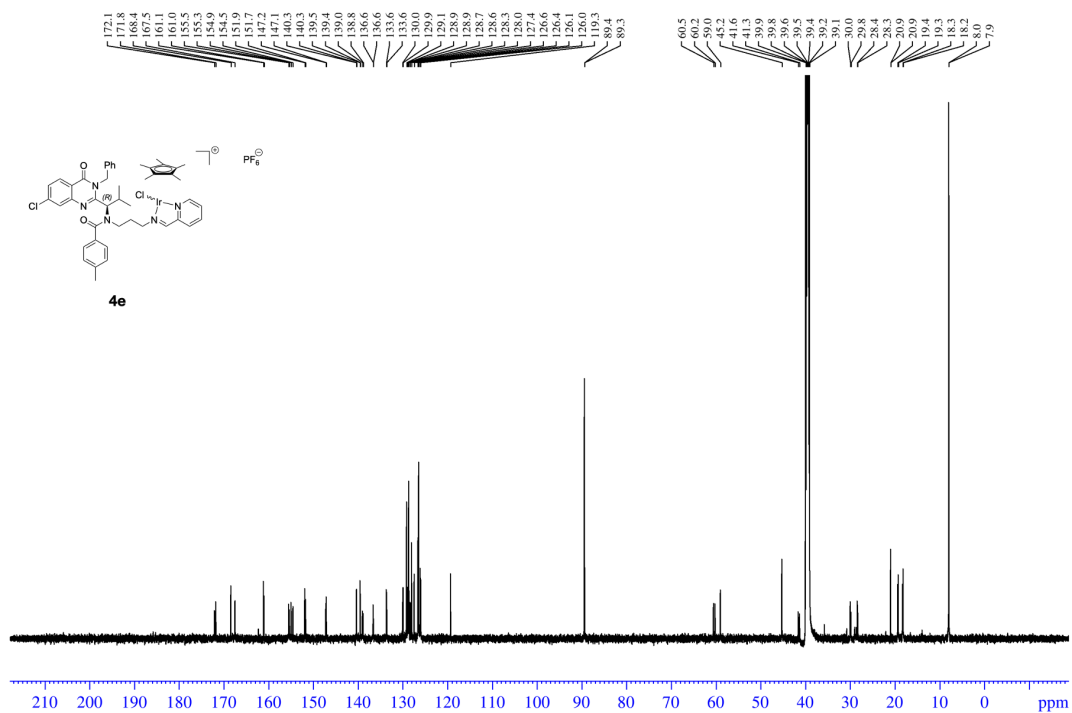

Supporting Figure S56.  $^{13}\text{C}\{^1\text{H}\}$  NMR of **4e** in  $\text{DMSO-d}_6$

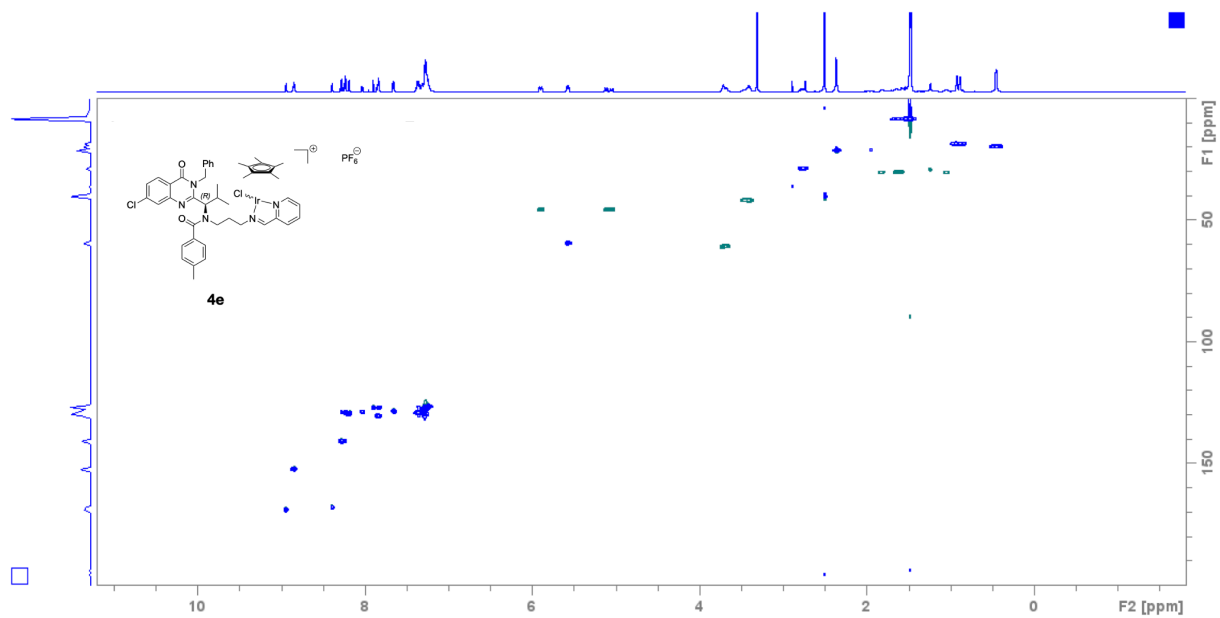

Supporting Figure S57.  $^1\text{H}$ - $^{13}\text{C}$  HSQC NMR of **4e** in  $\text{DMSO-d}_6$

## References

- (1) Lowe, J.; Li, H.; Downing, K. H.; Nogales, E. "Refined structure of alpha beta-tubulin at 3.5 Å resolution" *J. Mol. Biol.* **2001**, 313 (5), 1045-1057. DOI: 10.1006/jmbi.2001.5077.
- (2) Berman, H. M.; Westbrook, J.; Feng, Z.; Gilliland, G.; Bhat, T.; Weissig, H.; Shindyalov, I. N.; Bourne, P. E. "The protein data bank" *Nucleic Acids Res.* **2000**, 28 (1), 235-242.
- (3) Berman, H.; Henrick, K.; Nakamura, H. "Announcing the worldwide protein data bank" *Nat. Struct. Mol. Biol.* **2003**, 10 (12), 980-980.
- (4) "Scigress: Version FJ 2.6 (EU 3.1.7)" *Scigress: Version FJ 2.6 (EU 3.1.7) Fujitsu Limited* **2008-2016**.
- (5) Jones, G.; Willett, P.; Glen, R. C.; Leach, A. R.; Taylor, R. "Development and validation of a genetic algorithm for flexible docking" *J. Mol. Biol.* **1997**, 267 (3), 727-748.
- (6) Eldridge, M. D.; Murray, C. W.; Auton, T. R.; Paolini, G. V.; Mee, R. P. "Empirical scoring functions: I. The development of a fast empirical scoring function to estimate the binding affinity of ligands in receptor complexes" *J. Comput. Aided Mol. Des.* **1997**, 11 (5), 425-445.
- (7) Verdonk, M. L.; Cole, J. C.; Hartshorn, M. J.; Murray, C. W.; Taylor, R. D. "Improved protein-ligand docking using GOLD" *Proteins* **2003**, 52 (4), 609-623. DOI: 10.1002/prot.10465.
- (8) Korb, O.; Stutzle, T.; Exner, T. E. "Empirical scoring functions for advanced protein-ligand docking with PLANTS" *J. Chem. Inf. Model* **2009**, 49 (1), 84-96. DOI: 10.1021/ci800298z.
- (9) Mooij, W. T.; Verdonk, M. L. "General and targeted statistical potentials for protein-ligand interactions" *Proteins* **2005**, 61 (2), 272-287. DOI: 10.1002/prot.20588.
